1           **Global dissemination of *tet(X3)* and *tet(X6)* among livestock-associated**  
2           ***Acinetobacter* is sporadic and mediated by highly diverse plasmidomes**

3

4   Ying-Ying Cheng<sup>1</sup>, Yang Liu<sup>1</sup>, Yong Chen<sup>1</sup>, Fu-Man Huang<sup>2</sup>, Rong-Chang Chen<sup>1</sup>,  
5   Yong-Hong Xiao<sup>3</sup>, Kai Zhou<sup>1\*</sup>

6

7   <sup>1</sup>Shenzhen Institute of Respiratory Diseases, Second Clinical Medical College  
8   (Shenzhen People's Hospital), Jinan University; the First Affiliated Hospital  
9   (Shenzhen People's Hospital), Southern University of Science and Technology,  
10   Shenzhen, China;

11   <sup>2</sup>College of Biotechnology, Guilin Medical University, Guilin, China;

12   <sup>3</sup>Collaborative Innovation Center for Diagnosis and Treatment of Infectious Diseases,  
13   State Key Laboratory for Diagnosis and Treatment of Infectious Diseases, The First  
14   Affiliated Hospital, College of Medicine, Zhejiang University, Hangzhou, China.

15

16

17   Correspondence: Kai Zhou

18   Address: Dongmen North Road No. 1017, Shenzhen People's Hospital, 518020  
19   Shenzhen, China

20   E-mail: Kai\_Zhou@zju.edu.cn

21   Telephone: +86-571-2294-4111

22

23

24 **Abstract**

25 The emergence of plasmid-borne *tet(X)* genes mediated high-level resistance of  
26 tigecycline largely threatening its clinical effectiveness. Currently, the dissemination  
27 pattern of plasmid-borne *tet(X)* genes remains unclear. In this study, 684 fecal and  
28 environmental samples were collected at six livestock farms, and 15 *tet(X)*-positive  
29 *Acinetobacter* isolates were recovered, mainly including 9 *tet(X3)*- and 5  
30 *tet(X6)*-positive *A. towneri* strains. A clonal dissemination of *tet(X3)*-positive *A. towneri*  
31 was detected in a swine farm, while the *tet(X6)*-positive *A. towneri* strains mainly  
32 sporadically disseminated in the same farm. A *tet(X3)*-carrying plasmid (pAT181) was  
33 self-transmissible from a tigecycline-susceptible *A. towneri* strain to *A. baumannii*  
34 ATCC17978, causing a 128-fold and 64-512-fold increase in the MIC values of  
35 tigecycline and the other tetracyclines, respectively. Worryingly, pAT181 was stably  
36 maintained and increased the growth rate of ATCC17978. Further identification of  
37 *tet(X)*s in 10,680 *Acinetobacter* genomes retrieved from GenBank revealed that,  
38 *tet(X3)* (n=249) followed by *tet(X5)*-like (n=61) and *tet(X6)* (n=53) are the prevalent  
39 alleles mainly carried by four species, and most of them are livestock associated.  
40 Phylogenetic analysis showed that most of *tet(X3)*- and *tet(X6)*-positive isolates  
41 disseminate sporadically. The structures of *tet(X3)* and *tet(X6)* plasmidomes are  
42 highly diverse and no epidemic plasmids have emerged yet. However, cross-species  
43 and cross-region transmissions of *tet(X3)* might have been mediated by several  
44 plasmids in a small proportion of strains. Our study evidence that *tet(X3)* and *tet(X6)*

45 currently disseminate sporadically in *Acinetobacter*. Continuous surveillance for  
46 *tet(X)*s in the context of One Health is necessary to prevent them from transmitting to  
47 humans.

48

49 **Keywords:** tigecycline resistance, *tet(X3)*, *tet(X6)*, *Acinetobacter*, self-transmissible  
50 plasmid

51

## 52 **Importance**

53 Recently identified plasmid-borne *tet(X)* genes highly challenged the efficiency of  
54 tigecycline, a last resort antibiotic for severe infection. Currently, the dissemination  
55 pattern of plasmid-borne *tet(X)* genes remains unclear. In this study, we first identified  
56 plasmid-borne *tet(X)*-positive *Acinetobacter* spp. strains from fecal and environmental  
57 samples collected at six livestock farms. A clonal dissemination of *tet(X3)*-positive *A.*  
58 *towneri* was detected in a swine farm, while the *tet(X6)*-positive *A. towneri* strains  
59 mainly disseminated sporadically in the same farm. A *tet(X3)*-carrying plasmid was  
60 found self-transmissible resulting in enhanced tigecycline resistance and growth rate.  
61 Further exploring a global dataset of *tet(X)*-positive *Acinetobacter* genomes retrieved  
62 from GenBank revealed that most of *tet(X3)* and *tet(X6)*-positive isolates share highly  
63 distant relationship, and the structures of *tet(X3)* and *tet(X6)* plasmidomes are highly  
64 diverse. Our study evidence that *tet(X3)* and *tet(X6)* disseminate sporadically in  
65 *Acinetobacter* and continuous surveillance for *tet(X)*s in the context of One Health is  
66 necessary.

67

68

## 69 **Introduction**

70 Tigecycline is used to treat a wide range of clinical infection caused by  
71 Gram-positive and Gram-negative bacteria with multidrug resistance (MDR). With the  
72 global dissemination of carbapenemases and MCRs in recent years, this  
73 broad-spectrum tetracycline-family antibiotic has been raised to be a last line  
74 treatment regimen in clinical settings (1-6). However, the recent discoveries of  
75 transferable tigecycline inactivation genes [*tet(X)*s] particularly threaten the clinical  
76 efficacy of tigecycline (7, 8).

77 The first flavin-dependent monooxygenase gene *tet(X)* was identified in Tn4351  
78 and Tn4400 encoded on the chromosome of *Bacteroides fragilis* in 1990 (9).  
79 Subsequently, numerous chromosome-encoded and plasmid-mediated *tet(X)* alleles,  
80 *tet(X1)* to *tet(X14)*, have been reported in various species originating from animals,  
81 humans and environments (10-12). These Tet(X) variants, except Tet(X1), exhibited  
82 different levels of activity against almost all tetracyclines, including the fourth  
83 generation tetracycline (eravacycline) approved by the Food and Drug Administration  
84 (FDA) in 2018 (4, 12, 13). Remarkably, the first findings of plasmid-borne *tet(X3)* and  
85 *tet(X4)* identified in livestock-associated *Acinetobacter baumannii* and *Escherichia*  
86 *coli* strains in 2019 (7), respectively, raise the concern of horizontal transfer of  
87 tigecycline resistance. Since then, additional *tet(X)* alleles have been reported to be  
88 plasmid-borne, including *tet(X5)* and *tet(X6)* and their variants. Epidemiological

89 studies reveal that these novel *tet(X)* orthologs have mainly circulated in animals in  
90 China due to the heavy uses of tetracyclines in husbandry (8). However, plasmids are  
91 currently rarely reported to be the transmissible vectors of *tet(X)*s although an  
92 increasing number of plasmid-borne *tet(X)*s has been detected. In some pioneer  
93 studies, *ISCR2* is highlighted to be the key element facilitating the horizontal transfer  
94 of *tet(X)*s through circular intermediates (14-17). Therefore, the role of plasmids in the  
95 dissemination of *tet(X)*s remains obscure.

96 Surveillance studies show that the *tet(X)* alleles have been detected in over 16  
97 bacterial species with *Acinetobacter* spp. to be the predominate one, and *tet(X4)* is  
98 the only allele primarily detected in *E. coli* with a low prevalence (7, 11, 17-20). The  
99 *tet(X)*-positive *Acinetobacter* spp. isolates are mainly recovered from dairy cows,  
100 chickens and pigs in China (16, 21), and plasmid-borne and/or chromosomal-encoded  
101 *tet(X3)* and *tet(X6)* are prevalent among *Acinetobacter* spp. strains isolated from both  
102 humans and animals (7, 16, 20, 22, 23). A surveillance at avian farms showed that  
103 1.6-18.3% *Acinetobacter* spp. strains were *tet(X)*-positive among seven provinces in  
104 China (23). Another surveillance for tigecycline-resistant *Acinetobacter* spp. from  
105 2015 to 2018 in 14 provinces and municipalities in China reported that 2.3-25.3%  
106 *tet(X)*-positive isolates from pig farms, migratory birds and human samples were  
107 identified in 9 provinces (20). Currently, *tet(X5)* is solitarily detected in an *A.*  
108 *baumannii* strain from humans (22). However, it is unclear how the plasmid-borne  
109 *tet(X)*s disseminate among *Acinetobacter* spp., i.e. vertical transfer (clonal  
110 dissemination), horizontal transfer, and sporadic dissemination.

111 In this study, a surveillance of *tet(X)*-positive *Acinetobacter* spp. recovered from  
112 livestock and their surrounding environmental sources was performed at six livestock  
113 farms locating in Zhejiang province in 2019. The epidemiological and genetic  
114 characterizations of *tet(X)*-positive isolates and *tet(X)*-harboring plasmids were  
115 dissected. We further comprehensively investigated the population structure and  
116 distribution of *tet(X)*-positive *Acinetobacter* strains identified in the public database, as  
117 well as the plasmidome of *tet(X3)* and *tet(X6)*.

118

## 119 **Results**

### 120 ***A. towneri* was the prevalent species carrying *tet(X)* genes among** 121 ***Acinetobacter* strains collected in this study**

122 Two hundred and ninety-two strains were recovered from 534 stool samples and  
123 150 environmental samples collected from 2 swine farms, 2 dairy farms and 2 sheep  
124 farms, including 215 strains of *Acinetobacter* spp. and 77 strains belonging to other  
125 species. PCR screens of *tet(X)*s identified 23 positive isolates (7.88%; 23/292),  
126 including 15 *Acinetobacter* spp. isolates (6.88%; 15/218), 3 *Myroides odoratimimus*  
127 isolates and 5 *Empedobacter stercoris* isolates (Table 1). The 23 *tet(X)*-positive  
128 strains were exclusively isolated from swine farms. Twenty strains were recovered  
129 from the fecal samples of swine farm 1, and the 3 *M. odoratimimus* strains were from  
130 the soil samples of swine farm 2.

131 ANI analysis assigned the 15 *tet(X)*-positive *Acinetobacter* spp. isolates to *A.*  
132 *towneri* (n=14) and an unnamed species (n=1) (Table 1), suggesting that *A. towneri*

133 was the prevalent species carrying *tet(X)*s in *Acinetobacter* spp. population circulating  
134 at swine farms. Four different *tet(X)* alleles were detected in the 23 isolates, including  
135 *tet(X2)* detected in 5 *E. stercoris* isolates and 3 *M. odoratimimus* isolates, *tet(X3)* in 9  
136 *A. towneri* strains and 1 strain (ZJ199) belonging to the unnamed species, *tet(X6)* in 5  
137 *A. towneri* strains, and *tet(X14)* in 2 *E. stercoris* strains (ES183 has been described  
138 previously (10)) (Table 1). One *A. towneri* strain (AT185) carried two copies of *tet(X6)*.  
139 To our knowledge, this is the first report of two copies of *tet(X6)* identified in single  
140 strain. The phylogenetic analysis of 15 *tet(X)*-positive *Acinetobacter* spp. isolates  
141 showed that all but one *tet(X3)*-carrying *A. towneri* strains (8 out of 9) clustered  
142 together with 3-36 SNPs (Figure 1), suggesting a clonal dissemination of *tet(X3)*  
143 occurred in the swine farm. The other *tet(X3)*-carrying *A. towneri* strain AT200  
144 clustered with the *tet(X6)*-carrying strains with 27,664-30,557 SNPs (Figure 1). All but  
145 two *tet(X6)*-positive strains showed distant relationship (26,876-31,071 SNPs),  
146 indicating that they disseminated sporadically.

147

#### 148 **Antimicrobial resistance profile of *tet(X)*-carrying isolates**

149 AST results showed that 34.78% (8/23) of *tet(X)*-positive isolates were resistant to  
150 tigecycline with MIC values at 1-2 mg/L, and the other 15 isolates showed MIC values  
151 at 0.06-0.5 mg/L (Table 2). These tigecycline resistant strains encompass 4  
152 *tet(X3)*-positive *A. towneri* isolates, 1 *tet(X6)*-positive *A. towneri* isolate, 2 *tet(X2)*- and  
153 *tet(X14)*-positive *E. stercoris* isolates and 1 *tet(X2)*-positive *M. odoratimimus* isolate.  
154 Five tigecycline-resistant strains (3 *A. towneri* isolates and 2 *E. stercoris* isolates)

155 additionally exhibited resistance to the newly FDA-approved eravacycline with MIC  
156 values at 1-4 mg/L. Except that the strain (AT185) carrying 2 copies of *tet(X6)* was  
157 susceptible to tetracycline, the other 14 *Acinetobacter* spp. strains were resistant to  
158 tetracycline with MIC values  $\geq 16$  mg/L (Table 2). Strain AT232 showed significantly  
159 higher resistance to tetracyclines than the other 13 strains, which might be caused by  
160 the presence of a two component system AdeSR involved in the expression of the  
161 AdeABC efflux pump (24). In addition, 26.7% ( $n = 4$ ) and 13.3% ( $n = 2$ ) *Acinetobacter*  
162 spp. strains showed resistance to ciprofloxacin and doxycycline, respectively (Table 2).  
163 All of *tet(X)*-positive *Acinetobacter* spp. isolates were susceptible to colistin and  
164 carbapenems. *M. odoratimimus* isolates were resistance to both colistin and  
165 carbapenems due to intrinsic resistance (25).

166 *In silico* analysis of ARGs among *Acinetobacter* spp. strains showed that the  
167 number of ARGs detected in the strain ZJ199 [*sul2* and *tet(X3)*] was much less than  
168 that in *A. towneri* strains (Figure 1). All of *A. towneri* strains were MDR, and more  
169 ARGs were detected in the *tet(X6)*-carrying clone (mean=8.67; median=9) than in the  
170 *tet(X3)*-carrying clone (mean=6; median=6) albeit not significant ( $p > 0.05$ ) (Figure 1).  
171 The 8 strains of the *tet(X3)*-carrying clone shared an identical resistome [*aph(3'')*-*Ib*,  
172 *aph(3')*-*Ia*, *aph(6)*-*Id*, *cmIB1*, *sul2* and *tet(X3)*], further supporting the clonal  
173 dissemination (Figure 1). While the resistome of the *tet(X6)*-carrying strains was  
174 highly diverse, including *aacC4*, *ant(3'')*-*Ia* and *aph(4)*-*Ia* resistant to aminoglycoside;  
175 *bla<sub>OXA-58</sub>* resistant to beta-lactam; *floR* resistant to phenicol; *dfrA1* resistant to  
176 trimethoprim; *erm(B)*, *mph(E)* and *msr(E)* resistant to macrolide; *tet(X6)* and *tet(Y)*



177 resistant to tetracyclines (Figure 1). The resistome of *E. stercoris* and *M.*  
178 *odoratimimus* was different from that of *Acinetobacter* spp. (Table S1). *E. stercoris*  
179 strains carried *tet(X2)* and *tet(X14)* resistant to tetracyclines; *mef(C)* and *mph(G)*  
180 resistance to macrolide; and *bla<sub>EBR-1</sub>* resistant to beta-lactam. *M. odoratimimus* strains  
181 carried *tet(X2)* and *tet(36)* resistant to tetracyclines; *ereD* resistant to macrolide;  
182 *bla<sub>MUS-1</sub>* resistant to beta-lactam; and *sul2* resistant to macrolide (Table S1).

183

#### 184 ***tet(X3)* and *tet(X6)* were harbored by various plasmids**

185 To understand the vectors of the two prevalent *tet(X)* alleles, i.e. *tet(X3)* and *tet(X6)*,  
186 the representative *tet(X3)*- and *tet(X6)*-carrying *Acinetobacter* spp. strains (AT181,  
187 AT184, and ZJ199; AT232 and AT235) were chosen additionally for long-read  
188 sequencing based on their antimicrobial resistance profiles and genetic environments  
189 of *tet(X)*s. The hybrid assembly confirmed that *tet(X3)* and *tet(X6)* were plasmid-borne  
190 in the four *A. towneri* strains, and a chromosome-encoded *tet(X3)* was detected in  
191 strain ZJ199.

192 The *tet(X3)*-carrying plasmids detected in AT181 (pAT181) and AT184 (pAT184)  
193 were identical with a size of 75,969-bp, and were circularized (confirmed by PCR).  
194 These two plasmids were untypable with an average GC content of 42.5%. Multiple  
195 ARG genes were carried by the two plasmids, including *aph(3')-Ia*, *aph(3'')-Ib*,  
196 *aph(6)-Id*, *sul2*, and *tet(X3)*. Blast analysis of the nucleotide sequence of pAT181 in  
197 GenBank showed that the best match was a transferable *tet(X3)*-harboring plasmid  
198 p10FS3-1-3 (CP039146) (100% identity; 97% coverage) carried by a novel species of

199 *Acinetobacter* (20). Other plasmids sharing a high similarity with pAT181 included a  
200 *tet(X5)*-harboring plasmid pAB17H194-1 (99.95% identity; 86% coverage) carried by  
201 an *A. pittii* strain and a *tet(X3)*-harboring plasmid p18TQ-X3 (CP045132, 99.99%  
202 identity; 80% coverage) carried by an *A. indicus* strain. These data suggest that  
203 pAT181-like plasmids have disseminated among various species of *Acinetobacter*.

204 pAT181 was used as a reference to perform blast comparisons among our  
205 *tet(X3)*-carrying strains to evaluate the genetic similarities of the other *tet(X3)*-carrying  
206 plasmids. The results revealed a conserved backbone shared by *tet(X3)*-carrying  
207 plasmids harbored in the 8 clonal strains with a coverage and nucleotide-acid  
208 identity >90% (Figure S1A). The *tet(X3)*-carrying plasmid carried by strain AT200  
209 showed a different plasmid backbone with identity >90% and coverage <50% to  
210 pAT181 (Figure S1A). The best match of pAT200 was p10FS3-1-3 with 58.77%  
211 coverage and 70% identity, indicating that pAT200 might be a novel plasmid.

212 The two *tet(X6)*-harboring circularized plasmids pAT232 and pAT235 showed as  
213 low as 38% coverage and 99.95% identity between each other, suggesting that they  
214 were two different plasmids. pAT232 was 186,508-bp in length with GC content of  
215 41.03%. Blasting in GenBank showed that the best matches of pAT232 were a  
216 *tet(X6)*-carrying plasmid pAT205 (CP048015) (76% coverage and 99.99% identity)  
217 carried by an *A. towneri* strain AT205 isolated in the same swine farm (26), and a  
218 *tet(X)*-negative plasmid p19110F47-2 (CP046044) (70% coverage; 99.99% identity)  
219 carried by an *A. towneri* strain isolated from the pig. pAT235 was 124,466-bp in length  
220 with GC content of 41.16%. The best matches of pAT235 were pAT205 (49%

221 coverage; 100% identity) and a *tet(X3)*-harboring plasmid pGX7 (CP071772) (44%  
222 coverage and 99.95% identity) detected in an *A. towneri* strain isolated from the pig in  
223 China. These data suggest that pAT232 and pAT235 might originate from *A. towneri*  
224 associated with pigs.

225 When pAT232 was used as a reference to identify the plasmids of *tet(X6)* in the  
226 other *tet(X6)*-positive strains collected here, AT208 showed the highest similarity with  
227 pAT232 (77.84% coverage; 99.16% identity) (Figure S1B). When pAT235 was used  
228 as a reference, AT185 shared 100% coverage and 94.51% identity (Figure S1C),  
229 suggesting that a pAT235-like *tet(X6)*-encoding plasmid was harbored in AT185. Of  
230 note, AT185 was genetically distant from AT235 with 30,097 SNPs (Figure 1),  
231 suggesting that the horizontal transfer of pAT235-like plasmid might have occurred  
232 between the two strains. A pAT205-like *tet(X6)*-harboring plasmid was detected in  
233 AT208 when pAT205 was used as a reference (100% coverage; 96.48% identity)  
234 (Figure S1D). These results reveal that horizontal transfers of *tet(X6)*-carrying  
235 plasmids might have occurred in few strains.

236

### 237 **Genetic environment of *tet(X3)* and *tet(X6)***

238 The genetic environment of plasmid-borne *tet(X3)* [ $\Delta$ ISCR2-*xerD*-*tet(X3)*-*res*-ISCR2]  
239 detected in the 8 of 9 *A. towneri* strains was identical, which was highly similar with  
240 that of the prototype detected in *A. baumannii* strain 34AB (7) (Figure 2A). To fully  
241 understand the distribution of this genetic environment among *tet(X3)*-carrying  
242 *Acinetobacter* strains, we blasted it against 249 *tet(X3)*-carrying *Acinetobacter*

243 genomes retrieved from GenBank (see below), and results showed that 21.3%  
244 (53/249) genomes carry the fragment  $\Delta$ ISCR2-*xerD*-*tet*(X3)-*res*-ISCR2 locating on a  
245 single contig with >90% identity and >90% coverage. The proportion increased to  
246 86.35% (215/249) when matches on different contigs were counted together, implying  
247 that this might be the major structure encoding *tet*(X3) in *Acinetobacter* spp.. A  
248 different genetic environment of *tet*(X3) [IS4-IS4-*tet*(X3)-*res*- $\Delta$ ISCR2] was detected on  
249 the chromosome of strain ZJ199, in which ISCR2 and *xerD* located at the upstream of  
250 *tet*(X3) were replaced by two copies of IS4 (Figure 2A). Inspection of the wider context  
251 of *tet*(X3) in strain ZJ199 showed that two copies of IS4 adjacent to *sul2* and *glmM*  
252 located at the downstream of  $\Delta$ ISCR2 as found in an *A. indicus* strain AI2 (16) (Figure  
253 2A). This results in a putative IS4 bracketed transposon, which might be responsible  
254 for the mobilization of *tet*(X3) and *sul2*.

255 The genetic environment of *tet*(X6) was much more diverse than that of *tet*(X3)  
256 detected in our collection (Figure 2B). A 7,270-bp composite structure  
257 [ $\Delta$ ISCR2-IS30-*tet*(X6)-*abh-guaA*-ISCR2] was detected in pAT232, which is similar  
258 with the prototype [ $\Delta$ ISCR2-*tet*(X6)-*abh-guaA*-ISCR2] identified in pAT205 and a  
259 *Proteus* genomospecies 6 strain (26, 27), except for the insertion of an IS30 (Figure  
260 2B). The *tet*(X6) located within a 6,885-bp region [ISCR2-*fabF*-*tet*(X6)-*abh-glmM-sul2*]  
261 in pAT235 (Figure 2B), which shares 100% coverage and 99.58% identity with that  
262 detected on the chromosome of an *A. indicus* strain Q186-3\_T and 100% coverage  
263 and 98.70% identity with pABF9692 carried by an *A. baumannii* strain (CP048828). In  
264 strain AT185, the genetic context of one copy of *tet*(X6) was identical to that detected

265 in pAT235, and a truncated structure was found for the other copy (Figure 2B). The  
266 ISCR2-*fabF-tet(X6)-abh* fragment was also found on the chromosome of *A. indicus*  
267 strain LYS68A (CP070997) and *A. baumannii* strain 31FS3-2 (CP0445177), indicating  
268 that this structure might mediate the mobilization of *tet(X6)* on the plasmid and  
269 chromosome of *Acinetobacter* spp..

270

271 **A *tet(X3)*-carrying plasmid is self-transmissible from *A. towneri* to *A. baumannii***  
272 **and increased the resistance to tetracyclines and growth rate**

273 Conjugation assay was performed to test the transferability of *tet(X)*-encoding  
274 plasmids. We only obtained tigecycline-resistant transconjugants of *A. towneri* strain  
275 AT181 with frequencies at  $1.85 \times 10^{-6}$  per recipient cell. Multiple attempts of plasmid  
276 transfers failed when *E. coli* strain EC600 was used as a recipient. Compared with  
277 that of the recipient strain ATCC17978, the MIC value of tigecycline and the other  
278 tetracyclines against the transconjugant ATCC17978-pAT181 increased by 128-fold  
279 and 64~512-fold, respectively (Table S2). To understand the transmission pattern of  
280 *tet(X3)* (i.e., by plasmid or by a circular form), WGS were performed for  
281 ATCC17978-pAT181 and ATCC17978 to detect the transferrable structure of *tet(X3)*.  
282 A unique plasmid pAT181 was detected in the transconjugant ATCC17978-pAT181,  
283 demonstrating that the transmission of tigecycline resistance was mediated by  
284 pAT181 (Figure S2). This is different from another self-transmissible *tet(X3)*-harboring  
285 plasmid p10FS3-1-3 that the transfer of p10FS3-1-3 into *A. baylyi* ADP1 did not bring  
286 significant additive effect on the resistance to tetracyclines (20). To our best

287 knowledge, this is the first report showing that the horizontal transfer of  
288 *tet(X3)*-carrying plasmid conferring tetracyclines resistance to the recipient.

289 *tet(X3)* was stable in the recipient strain ATCC17978 without antibiotic stress after  
290 10-day passage, with 100% retention rate, indicating that pAT181 is able to be stably  
291 maintained in ATCC17978. The growth rate of the transconjugant  
292 ATCC17978-pAT181 increased compared with that of ATCC17978, and the doubling  
293 time shortened from 4.59 h to 2.91 h (Figure 3). These results suggest that pAT181  
294 could facilitate the dissemination of *tet(X3)* among *Acinetobacter* spp..

295

296 ***tet(X3)* and *tet(X6)* are the prevalent alleles of *tet(X)* family and mainly**  
297 **sporadically disseminate in four species of *Acinetobacter* spp.**

298 As shown in this and other studies (7, 16, 17, 20, 23), *Acinetobacter* spp. is the  
299 major host of *tet(X)*s. To fully understand the distribution of *tet(X)*s among  
300 *Acinetobacter* spp., the nucleotide-acid sequences of 15 known *tet(X)* alleles and their  
301 variants were blasted against 10,680 *Acinetobacter* genomes retrieved from GenBank.  
302 *tet(X3)* was found in 249 strains; *tet(X4)* in 9 strains; *tet(X5)*, *tet(X5.2)* and *tet(X5.3)* in  
303 61 strains; *tet(X6)* in 53 strains; *tet(X13)*, an one-residue variant of *tet(X6)*, was found  
304 in 4 strains. These data reveal that *tet(X3)*, *tet(X5.2)* and *tet(X6)* are the prevalent  
305 *tet(X)* genes among *Acinetobacter* spp..

306 Species identification showed three predominant *Acinetobacter* species carrying  
307 *tet(X3)*, i.e. *A. indicus* (27.71%; 69/249), *Acinetobacter* sp002018365 (26.51%;  
308 66/249) (an unnamed species with *Acinetobacter* sp. ANC 4845 as the reference) and

309 *A. towneri* (13.65%; 34/249). Except for *A. variabilis* (11.32%; 6/53), *A. indicus*  
310 (22.64%; 12/53), *Acinetobacter* sp002018365 (20.75%; 11/53) and *A. towneri*  
311 (11.32%; 6/53) are also the predominant species carrying *tet*(X6). The species  
312 distribution of *tet*(X5.2) was similar with *tet*(X6), and the major species include *A.*  
313 *indicus* (22.64%; 12/53), *Acinetobacter* sp002018365 (20.75%; 11/53), and *A. towneri*  
314 (11.32%; 6/53), *A. variabilis* (11.32%; 6/53) and *A. Iwoffii* (11.32%; 6/53). These  
315 results indicate that *A. indicus* and *Acinetobacter* sp002018365 are the most  
316 prevalent species carrying *tet*(X) genes.

317 To further evaluate the dissemination pattern of *tet*(X3) and *tet*(X6) among  
318 *Acinetobacter* population, we performed phylo-genomic analysis for  
319 *tet*(X3)/*tet*(X6)-positive strains of four major hosts as representatives, i.e. *A. indicus*,  
320 *Acinetobacter* sp002018365, *A. towneri* and *A. variabilis* (Figure 4; Figure S3). Most  
321 strains of each species shared a distant relationship, and no epidemic clones were  
322 detected. Two inter-regional transmission events were detected for 4 (no SNPs) and 5  
323 (0-1 SNP) strains of *A. indicus*, and one cross-host event (pig and environment) was  
324 detected for 4 (1-44 SNPs) strains of *Acinetobacter* sp002018365 (Figure 4). The data  
325 suggest that *tet*(X3) and *tet*(X6) mainly sporadically disseminate among  
326 *Acinetobacter* population.

327

328 **The structures of *tet*(X3)/*tet*(X6) plasmidome are highly diverse and no epidemic**  
329 **plasmids have emerged among *Acinetobacter* population yet**

330 To explore the role of plasmids in the disseminations of *tet*(X3) and *tet*(X6) in

331 *Acinetobacter* spp., we here intended to dissect the genetic relatedness of *tet(X3)* and  
332 *tet(X6)*-harboring plasmids. Four circularized *tet(X3)/tet(X6)*-harboring plasmids  
333 obtained in this study and all finished *tet(X3)/tet(X6)*-harboring plasmids deposited in  
334 GenBank [n = 30; 18 for *tet(X3)*, 6 for *tet(X6)*, and 6 for *tet(X3)* and *tet(X6)*] were  
335 analyzed at first. All but two of these publicly available plasmids were collected  
336 between 2009 and 2020 in China, and 25 were identified in *Acinetobacter* spp. (Figure  
337 5). Pairwise comparisons using nucleotide-acid sequences revealed that most of the  
338 26 *tet(X3)*-harboring plasmids (including the 6 *tet(X3)-tet(X6)*-harboring plasmids)  
339 share a coverage lower than 65%, indicating a highly diverse structure for the  
340 plasmidome of *tet(X3)* (Figure 5A). Four of the 6 *tet(X3)-tet(X6)*-positive plasmids  
341 share a high similarity (>89.83% coverage; >85% identity), suggesting that they were  
342 derived from an ancestor. The 4 plasmids were hosted in *A. schindleri* and *A. indicus*  
343 isolated from goose and soil collected in different provinces of China (Figure 5A),  
344 indicating that cross-species, cross-sector (poultry and environment) and/or  
345 cross-region transmission has occurred for these plasmids. A similar transmission  
346 event was observed for another three *tet(X3)*-encoding plasmids (pAT181, pAT184  
347 and p10FS3-1-3) carried by *A. towneri* and a novel species of *Acinetobacter* as  
348 aforementioned (Figure 5A).

349 The pairwise sequence comparison of 14 *tet(X6)*-harboring plasmids (including the  
350 6 *tet(X3)-tet(X6)*-harboring plasmids) showed that, the 5 *tet(X6)*-harboring plasmids  
351 carried by *Acinetobacter* and an unknown species share a low similarity, except for  
352 pAT232 and pAT205 as aforementioned (Figure 5B). They are different from the 3



353 *tet(X6)*-harboring plasmids (pAZ25, pZN3 and pZN2) carried by *Proteus* species, and  
354 the 6 *tet(X3)*-*tet(X6)*-harboring plasmids (Figure 5B). This suggests that the  
355 *tet(X3)*-*tet(X6)*-harboring plasmids might be resulted from the capture of *tet(X6)* by  
356 *tet(X3)*-harboring plasmids.

357 To further understand the distribution of *tet(X3)*-harboring plasmids among  
358 *Acinetobacter* spp., we selected 17 plasmids out of 26 *tet(X3)*-harboring plasmids as  
359 reference according to their similarities (< 80% coverage and identity). The 17  
360 plasmids were blasted against the 243 *tet(X3)*-positive genomes (6 genomes with  
361 chromosome-encoding *tet(X3)* were excluded), and no epidemic plasmids were found  
362 (Figure 6A). To evaluate structural conservation of plasmids amongst *tet(X3)*-positive  
363 isolates, we mapped the 243 genomic sequences against the 17 representative  
364 plasmid sequences (Fig. 6B). This revealed that plasmid structures were highly  
365 diverse amongst isolates (mean plasmid coverage range 12.09-55.05%). Using a  
366 cutoff range of >80% coverage and >90% identity, we found that a pGX5-like plasmid  
367 was hosted in 36 strains belonging to different species (20 *A. towneri* strains, 10 *A.*  
368 *variabilis* strains, 4 *Acinetobacter* sp002018365 strains and 2 *A. indicus* strains), and  
369 a p34AB-like, a p94-2-*tetX3*-like, a pXM9F202-2-*tetX*-90k-like and a p10FS3-1-3-like  
370 plasmid were found in 17, 9, 8, and 7 strains belonging to different species,  
371 respectively (Figure 6A). These data suggest that the current dissemination of *tet(X3)*  
372 in *Acinetobacter* is mainly mediated by various plasmids, and cross-species  
373 transmissions mediated by few of them might have occurred in a small proportion of  
374 strains.

375

### 376 **The promoter of *tet(X3)* and *tet(X6)* is interchangeable**

377 Our previous study showed that *tet(X3)* confers higher tigecycline resistance than  
378 *tet(X6)* (26). In order to understand whether this difference is resulted from the  
379 different promoters of the two genes, constructions of promoter-exchanged  
380 overexpression plasmids were performed. Transformants carrying the expression  
381 cassette promoter<sub>*tet(X6)*</sub>-ORF<sub>*tet(X3)*</sub> [*tet(X3)* ORF followed *tet(X6)* promoter] exhibited the  
382 same level of resistance with that of the original cassette promoter<sub>*tet(X3)*</sub>-ORF<sub>*tet(X3)*</sub>  
383 (Table 3). Likewise, the reconstruction of expression cassette promoter<sub>*tet(X3)*</sub>-ORF<sub>*tet(X6)*</sub>  
384 did not alter the activity of *tet(X6)* either (Table 3). These results suggest that the  
385 tigecycline resistance activity of *tet(X3)* and *tet(X6)* could be determined by the  
386 sequence of ORFs and the promoter of *tet(X3)* and *tet(X6)* is interchangeable.

387

### 388 **Discussion**

389 A total of 15 *tet(X)* alleles have been reported since 1990 (9), and they have spread  
390 to cover 5 of the 7 continents (8). Recent surveillance for *tet(X)*s reveals the wide  
391 range of ecosystems, including soil, sewage, animals, hospitals, livestock farms and  
392 human gut (14-16, 28). The *tet(X)*-positive isolates are especially prevalent in  
393 livestock and poultry, like pigs, cows, chicken, and less in shrimp, migratory birds and  
394 waterfowls (7, 16, 18, 23, 28-31). In this study, we comprehensively characterized  
395 *tet(X)*-positive strains collected from different livestock farms (swine farms, dairy  
396 farms and sheep farms), and we found that *tet(X)*-positive strains were exclusively

397 isolated from swine farms (Table 1). A similar finding has been reported recently that  
398 *tet(X3)*-positive *Acinetobacter* spp. isolates were exclusively detected in the intensive  
399 pig farms in China (20). These results suggest that the dissemination risk of *tet(X)*  
400 genes to human from pigs could be much higher than from other livestock.

401 Current surveillances show that *Acinetobacter* spp. is the major reservoir of *tet(X)*  
402 genes (17, 20, 23). In this study, *A. towneri* was found to be the major host of *tet(X3)*  
403 and *tet(X6)*. A recent surveillance of *tet(X)*-positive *Acinetobacter* isolates from human,  
404 animal, and their surrounding environments conducted between 2015 and 2018  
405 shows that *A. towneri* and *A. indicus* following a novel species of *Acinetobacter* were  
406 the major hosts of *tet(X3)*, *tet(X4)* and *tet(X5)* (20). This indicates that the diversity of  
407 *tet(X)* hosts may be source- and/or geographic-dependent. To fully understand the  
408 distribution of *tet(X)*s in *Acinetobacter* population, we searched 15 *tet(X)* alleles and  
409 their variants in all *Acinetobacter* genomes available in GenBank, and results  
410 revealed that *tet(X3)* and *tet(X6)* are the predominant alleles mostly associated with  
411 livestock, and *A. towneri* is the third prevalent species carrying *tet(X3)* and *tet(X6)*  
412 following *A. indicus* and *Acinetobacter* sp002018365. Further analysis showed that  
413 the population structure of the four major species is highly diverse (Figure 4 and S3),  
414 suggesting that *tet(X3)* and *tet(X6)* are mainly sporadic dissemination. However, few  
415 inter-regional transmission events were detected here, highlighting the needs for  
416 controlling the dissemination of *tet(X3)* and *tet(X6)* positive *Acinetobacter* spp.,  
417 especially from livestock to humans.

418 First identification of plasmid-borne *tet(X3)* and *tet(X4)* causing the horizontal

419 transfer of tigecycline resistance has highly aroused the public attention. Since then,  
420 numerous *tet(X)* alleles have been continuously identified either on chromosomes or  
421 on plasmids in various bacterial species. However, whether plasmids are the major  
422 vectors of plasmid-borne *tet(X)*s remains unclear. Pioneer studies have shown the  
423 importance of ISCR2-mediated *tet(X)* transposition structure (7, 17). The rolling-circle  
424 transposition has been experimentally confirmed by using the cassette  
425 “*ΔtpnF-tet(X3)-hp-hp-ISCR2*” clone, and inverse PCR assays identified  
426 “*ISCR2-xerD-tet(X3)-res-ORF1*” and “*ISCR2-ORF2-abh-tet(X4)*” minicircles in  
427 different studies (7, 20). In our study, ISCR2 was found upstream or downstream of  
428 *tet(X3)* and *tet(X6)* genes. Albeit we did not test the transferability of the  
429 ISCR2-mediated *tet(X)* transposition structure, the genetic context of *tet(X3)* carried  
430 by 249 genomes of *Acinetobacter* species were comprehensively compared. The  
431 proportion of the structure *ISCR2-xerD-tet(X3)-res-ISCR2* might be up to 86.35%  
432 (215/249), implying the critical role of ISCR2 in the dissemination of *tet(X3)*.

433 Of note, we found that a *tet(X3)*-encoding plasmid pAT181 was self-transmissible  
434 from *A. towneri* to *A. baumannii*, and conferred tetracyclines resistance to the  
435 recipient. Currently, very few studies have identified self-transmissible plasmids  
436 carrying *tet(X)*s. Chen *et al.* reported the conjugability of a *tet(X3)*- and  
437 *tet(X5.3)*-harboring plasmid pYH12207-2 from *A. piscicola* to *A. baylyi* ADP1, and the  
438 conjugability of a *tet(X3)*-harboring plasmid p10FS3-1-3 from an *Acinetobacter* novel  
439 species to *A. baylyi* ADP1. However, these two plasmids did not enhance the  
440 resistance to tetracyclines in the recipient strain (20). This is different from our findings

441 that the transfer of pAT181 to the recipient resulted in a 64-512-fold increase of  
442 tetracyclines resistance (Table S2). Remarkably, the donor strain of pAT181 is a  
443 tigecycline-susceptible *A. towneri* strain, and the recipient strain is *A. baumannii*,  
444 suggesting that the expression of *tet(X3)* could be species-dependent. More than half  
445 of *tet(X3)/tet(X6)*-positive *A. towneri* strains were tigecycline-susceptible in this study,  
446 indicating the silent transmission of *tet(X3)/tet(X6)* in *A. towneri*. Concerningly,  
447 pAT181 with a relatively high transfer frequency ( $10^{-6}$ ) did not impose fitness cost but  
448 increased the growth rate of the recipient. It is suggested that successful  
449 disseminations of resistance plasmids largely depends on the fitness cost imposed on  
450 hosts (32). No fitness cost imposed on hosts by obtaining pAT181-like plasmids would  
451 greatly facilitate their spread, thus may contribute to the propagation of *tet(X3)* gene in  
452 the future. Additionally, although no epidemic plasmids of *tet(X3)* have been detected  
453 currently, several plasmids were found circulating in a small proportion of strains. It is  
454 possible that these plasmids could become epidemic after transmitting to other hosts  
455 in the future.

456

## 457 **Conclusions**

458 Our study evidence that the predominate *tet(X)* alleles, *tet(X3)* and *tet(X6)*,  
459 disseminate sporadically in *Acinetobacter* population. Currently, the dissemination of  
460 *tet(X3)* and *tet(X6)* is mainly limited among livestock-associated sites. Continuous  
461 surveillance for *tet(X)*s in the context of One Health is necessary to prevent them from  
462 transmitting to humans.

463

## 464 **Materials and Methods**

### 465 **Screenings of *tet(X)*-positive *Acinetobacter* spp. strains**

466 Five hundred and thirty-four non-repetitive fecal samples were collected from 6  
467 livestock farms locating in Zhejiang province in 2019, including 2 swine farms, 2 dairy  
468 farms and 2 sheep farms. Environmental samples were collected from soil (n=72) and  
469 water (n=78) surrounding the farms in parallel. These samples were initially enriched  
470 in LB medium (5 g/L yeast extract, 10 g/L tryptone, 10 g/L NaCl) for 6 hours and  
471 spread on CHROMagar™ *Acinetobacter* medium plates (CHROMagar, Paris, France)  
472 to recover *Acinetobacter* spp. strains. PCR screens of *tet(X)* alleles were performed  
473 as previously described (26).

474

### 475 **Antimicrobial susceptibility testing (AST)**

476 The minimum inhibitory concentration (MICs) for all *tet(X)* positive strains were  
477 determined using microbroth dilution method according to the guideline of Clinical and  
478 Laboratory Standards Institute (CLSI) (29th edition) (33). The tested drugs included  
479 tigecycline, tetracycline, eravacycline, minocycline, doxycycline, demeclocycline,  
480 chlortetracycline, oxytetracycline, colistin, cefoperazone-sulbactam,  
481 trimethoprim-sulfamethoxazole, gentamicin, amikacin, levofloxacin, ciprofloxacin,  
482 meropenem, cefepime, ceftriaxone, and ceftazidime. The breakpoint for tetracycline  
483 was interpreted as  $\geq 16$  mg/L for *Acinetobacter* spp., *Enterobacteriaceae* and  
484 non-*Enterobacteriaceae* according to CLSI (33). The breakpoint for tigecycline and

485 eravacycline was interpreted as > 0.5 mg/L for *Enterobacteriaceae* according to  
486 EUCAST V10 (34). *E. coli* ATCC25922 was used as the quality control strain.

487

#### 488 **Whole genome sequencing (WGS) and bioinformatic analysis**

489 Genomic DNAs of *tet(X)*-positive isolates were extracted by using Puregene  
490 Yeast/Bact Kit B (Qiagen, Gaithersburg, MD, Germany) according to the instruction of  
491 the manufacture, and were sequenced by using Hiseq 4000 system (Illumina, San  
492 Diego, United States). The average nucleotide identity (ANI) was calculated by using  
493 FastANI (35). Sequence similarity of *tet(X)*-harboring plasmids was analyzed by using  
494 BRIG v0.95 (36). Representative strains with various genetic context of *tet(X)* genes  
495 were selected out to be further sequenced by using PromethION platform (Nanopore,  
496 Oxford, UK). Hybrid assembly of short reads and long reads sequencing data was  
497 performed by using Unicycler version 0.4.8 (37).

498 Phylogenetic analysis was performed by using Parsnp v1.2 (38), and the number  
499 of SNPs (single nucleotide polymorphisms) among the core genomes were  
500 determined by MEGA X (39). Functional annotation was performed using RAST  
501 server (40). Antibiotic resistance genes (ARGs) were identified by using ResFinder  
502 4.0 (41) and CARD (<https://card.mcmaster.ca/>) with the threshold of nucleotide-acid  
503 identity >90% and coverage >90%. Synteny analysis was performed by using Easyfig  
504 (42).

505

#### 506 **Compilation of genomic data set and plasmidome analysis**

507 All assembled genomes of *Acinetobacter* spp. (n= 10,680) deposited in GenBank  
508 (as of 31th May 2021) were downloaded to search *tet(X)* alleles. The fifteen *tet(X)*  
509 alleles were queried in these genomes by blasting against their nucleotide-acid  
510 sequences using a cutoff as 99% identity and 100% coverage.

511 Conservation of reference plasmid genes was calculated as previously described  
512 (43). Briefly, RedDog pipeline (<https://github.com/katholt/RedDog>) was used to  
513 simulate 100-bp reads from *tet(X3)*-carrying genomes. To calculate the coverage of  
514 each representative plasmid in each genome, those 100-bp reads were mapped  
515 against representative *tet(X3)*-harboring plasmids by using Bowtie2 v2.2.9 (44). The  
516 proportion of *tet(X3)*-carrying genomes containing annotated genes of each reference  
517 plasmid was calculated according to the gene presence/absence table reported by  
518 Red-Dog (at least five reads covering  $\geq 95\%$  of the length of the gene was defined as  
519 presence) and plotted as circular heatmaps using ggplot2 in R (geom\_tile for heatmap  
520 grid and coord\_polar for circularise).

521 Pairwise sequence comparison of circularized plasmids was performed as  
522 previously described (45). Briefly, the length of nucleotide-acid sequence that could  
523 be aligned between pairs of plasmids and the number of SNPs among the aligned  
524 regions were determined by NUCmer v3.1 (46) from the MUMmer package. The  
525 percentage of aligned bases between pairs of complete plasmids was showed in  
526 heatmap generated by the “gplots” package (v3.1.1) in R v4.0.5  
527 (<https://www.r-project.org/>).

528



529 **Conjugation assay**

530 The transmissibility of *tet(X3)* and *tet(X6)* was evaluated by conjugation assay.  
531 Briefly, *tet(X)*-carrying *Acinetobacter* strain as a donor strain was mixed with  
532 rifampicin-resistant *A. baumannii* ATCC17978 or rifampicin-resistant *E. coli* EC600 as  
533 a recipient strain at the ratio of 1:1 by conjugational mating at 37°C without shaking for  
534 overnight. The transconjugants were selected on LB agar plates containing rifampicin  
535 (600 mg/L) and tigecycline (2 mg/L). The species of all putative transconjugants were  
536 verified by using MALDI-TOF mass spectrometry (Hexin, Guangzhou, China). PCR  
537 verifications of *tet(X)* genes were performed for the putative transconjugants of which  
538 the species was confirmed as *A. baumannii* or *E. coli*. Transfer frequency was  
539 calculated as the number of transconjugants obtained per donor. Growth of donor  
540 strain and transconjugants were measured by determining the optical density at 600  
541 nm (OD<sub>600</sub>) every 30 min.

542

543 **Plasmid stability testing**

544 Plasmid stability was estimated according to a previous study with minor  
545 modifications (47). Transconjugants were cultured in antibiotic-free LB broth at 37°C  
546 for 24 h. The 24h-growth cultures were diluted with the ratio of 1:100 in fresh LB  
547 medium. These freshly inoculated cultures constituted time point zero, and cultures  
548 were grown at 37°C in a shaking bath (200 rpm) and went on serial passages for 10  
549 days (approximately 200 generations). Cultures were diluted and plated onto  
550 antibiotic-free LB plates every 24 h. The colonies growing on antibiotic-free LB agar

551 plates were randomly selected (~50 colony per day) for *tet(X)*-specific PCRs to  
552 determine the proportion of *tet(X)*-positive bacteria in each population. Plasmids were  
553 considered stable when the retention rates were still over 80% at the end of the  
554 experiment. The plasmid stability was evaluated in triplicate.

555

## 556 **Functional cloning**

557 Predicted promoters of *tet(X3)* and *tet(X6)* according to softberry  
558 (<http://www.softberry.com/berry.phtml?topic=bprom&group=programs&subgroup=gfin>  
559 db) were fused with open reading frames (ORFs) of *tet(X3)* and *tet(X6)* to construct  
560 promoter exchanged clones, respectively. Briefly, the promoter region of *tet(X3)* was  
561 amplified using primers PstI-*tet(X3)*-F-P  
562 (5'-cgctgcagTACCACCAAGGGAATGGAAC-3') and X3P+X6O-R  
563 (5'-GTTCGCTGGTTTTAATGTCAATCAAAAATGGCACATAACAAG-3'), and the ORF  
564 of *tet(X6)* was amplified using primers X3P+X6O-F  
565 (5'-CTTGTTATGTGCCATTTTTGATTGACATTAACCAGCGAAC-3') and  
566 XbaI-*tet(X6)*-R (5'-cgtctagaTTTCTCTTTCATTTCTCCTCGCC-3'). The derived  
567 amplicons were fused by the fusion PCR using primers PstI-*tet(X3)*-F-P and  
568 XbaI-*tet(X6)*-R, resulting in an X3P-X6O fragment. The digested X3P-X6O fragment  
569 was cloned into pUC19 to construct pUC19-X3P-X6O. Likewise, primers  
570 PstI-*tet(X6)*-F-P (5'-cgctgcagATGGTTGCAGACCTTGACGA-3') and X6P+X3O-R  
571 (5'-CGTATCTATTCGCATTGTCATCTAATGTCTGTCAATTTAATC-3') were used to  
572 amplify the promoter region of *tet(X6)*. Primers X6P+X3O-F

573 (5'-GATTAAATTGACAGACATTAGATGACAATGCCGAATAGATACG-3') and  
574 XbaI-*tet*(X3)-R (5'-cgtctagaGCAAAACTGCTTGTTAGTAGC-3') were used to amplify  
575 the ORF of *tet*(X3). The fused amplicon X6P-X3O was ligated into pUC19 to construct  
576 pUC19-X6P-X3O. The recombinant plasmid was transformed into *E. coli* DH5 $\alpha$   
577 competent cells by heat shock. Transformants were selected on LB agar plates  
578 containing 100 mg/L ampicillin. *tet*(X3) and *tet*(X6) with parental promoters were  
579 individually cloned into pUC19 as positive controls.

580

#### 581 **Statistical analysis**

582 Statistical analysis was performed using unpaired *t*-test analysis, and statistical  
583 significance is taken as  $p < 0.05$ .

584

#### 585 **Ethics approval and consent to participate**

586 Not applicable.

587

#### 588 **Consent for publication**

589 Not applicable.

590

#### 591 **Data availability**

592 The genome sequences of *tet*(X) positive strains have been submitted to  
593 GenBank, and the accession numbers are listed in Table 1.

594

595 **Competing interests**

596 The authors declare that they have no competing interests.

597

598 **Authors' contributions**

599 KZ, Y-YC, Y-HX, and R-CC designed the study. Y-YC, YC, and F-MH collected the  
600 data. Y-YC and YL analyzed and interpreted the data. Y-YC and KZ wrote and revised  
601 the manuscript. All authors reviewed, revised, and approved the final report

602

603 **Acknowledgements**

604 This work was supported by the National Key Research and Development Program  
605 of China (grant number 2017YFC1200200); the National Natural Science Foundation  
606 of China (grant numbers 81902029); Shenzhen Basic Research Key projects (grant  
607 numbers JCYJ20200109144220704) and Shenzhen Basic Research projects (grant  
608 numbers JCYJ20190807144409307; JCYJ20190807150401657).

609

610 **References**

- 611 1. Wu W, Feng Y, Tang G, Qiao F, McNally A, Zong Z. 2019. NDM  
612 Metallo-beta-Lactamases and Their Bacterial Producers in Health Care  
613 Settings. *Clin Microbiol Rev* 32.
- 614 2. Nang SC, Li J, Velkov T. 2019. The rise and spread of mcr plasmid-mediated  
615 polymyxin resistance. *Crit Rev Microbiol* 45:131-161.
- 616 3. Wang C, Feng Y, Liu L, Wei L, Kang M, Zong Z. 2020. Identification of novel

- 617 mobile colistin resistance gene *mcr-10*. *Emerg Microbes Infect* 9:508-516.
- 618 4. Doan TL, Fung HB, Mehta D, Riska PF. 2006. Tigecycline: a glycolcycline  
619 antimicrobial agent. *Clin Ther* 28:1079-1106.
- 620 5. Wang X, Wang Y, Zhou Y, Li J, Yin W, Wang S, Zhang S, Shen J, Shen Z,  
621 Wang Y. 2018. Emergence of a novel mobile colistin resistance gene, *mcr-8*, in  
622 NDM-producing *Klebsiella pneumoniae*. *Emerg Microbes Infect* 7:122.
- 623 6. Huang H, Dong N, Shu L, Lu J, Sun Q, Chan EW, Chen S, Zhang R. 2020.  
624 Colistin-resistance gene *mcr* in clinical carbapenem-resistant  
625 *Enterobacteriaceae* strains in China, 2014-2019. *Emerg Microbes Infect*  
626 9:237-245.
- 627 7. He T, Wang R, Liu D, Walsh TR, Zhang R, Lv Y, Ke Y, Ji Q, Wei R, Liu Z, Shen  
628 Y, Wang G, Sun L, Lei L, Lv Z, Li Y, Pang M, Wang L, Sun Q, Fu Y, Song H,  
629 Hao Y, Shen Z, Wang S, Chen G, Wu C, Shen J, Wang Y. 2019. Emergence of  
630 plasmid-mediated high-level tigecycline resistance genes in animals and  
631 humans. *Nat Microbiol* 4:1450-1456.
- 632 8. Fang LX, Chen C, Cui CY, Li XP, Zhang Y, Liao XP, Sun J, Liu YH. 2020.  
633 Emerging High-Level Tigecycline Resistance: Novel Tetracycline Destructases  
634 Spread via the Mobile Tet(X). *Bioessays* 42:e2000014.
- 635 9. Speer BS, Bedzyk L, Salyers AA. 1991. Evidence that a novel tetracycline  
636 resistance gene found on two *Bacteroides* transposons encodes an  
637 NADP-requiring oxidoreductase. *J Bacteriol* 173:176-83.
- 638 10. Cheng Y, Chen Y, Liu Y, Guo Y, Zhou Y, Xiao T, Zhang S, Xu H, Chen Y, Shan

- 639 T, Xiao Y, Zhou K. 2020. Identification of novel tetracycline resistance gene  
640 *tet(X14)* and its co-occurrence with *tet(X2)* in a tigecycline-resistant and  
641 colistin-resistant *Empedobacter stercoris*. *Emerg Microbes Infect*  
642 9:1843-1852.
- 643 11. Zhang R, Dong N, Shen Z, Zeng Y, Lu J, Liu C, Zhou H, Hu Y, Sun Q, Cheng Q,  
644 Shu L, Cai J, Chan EW, Chen G, Chen S. 2020. Epidemiological and  
645 phylogenetic analysis reveals *Flavobacteriaceae* as potential ancestral source  
646 of tigecycline resistance gene *tet(X)*. *Nat Commun* 11:4648.
- 647 12. Gasparrini AJ, Markley JL, Kumar H, Wang B, Fang L, Irum S, Symister CT,  
648 Wallace M, Burnham CD, Andleeb S, Tolia NH, Wencewicz TA, Dantas G.  
649 2020. Tetracycline-inactivating enzymes from environmental, human  
650 commensal, and pathogenic bacteria cause broad-spectrum tetracycline  
651 resistance. *Commun Biol* 3:241.
- 652 13. Lee YR, Burton CE. 2019. Eravacycline, a newly approved fluorocycline. *Eur J*  
653 *Clin Microbiol Infect Dis* 38:1787-1794.
- 654 14. Sun C, Cui M, Zhang S, Wang H, Song L, Zhang C, Zhao Q, Liu D, Wang Y,  
655 Shen J, Xu S, Wu C. 2019. Plasmid-mediated tigecycline-resistant gene *tet(X4)*  
656 in *Escherichia coli* from food-producing animals, China, 2008-2018. *Emerg*  
657 *Microbes Infect* 8:1524-1527.
- 658 15. Li R, Peng K, Li Y, Liu Y, Wang Z. 2020. Exploring *tet(X)*-bearing  
659 tigecycline-resistant bacteria of swine farming environments. *Sci Total Environ*  
660 733:139306.

- 661 16. Zhang R, Dong N, Zeng Y, Shen Z, Lu J, Liu C, Huang ZA, Sun Q, Cheng Q,  
662 Shu L, Cai J, Waichi Chan E, Liu D, Chen G, Wang Y, Chen S. 2020.  
663 Chromosomal and plasmid-borne tigecycline resistance genes *tet(X3)* and  
664 *tet(X4)* in dairy cows in a Chinese farm. *Antimicrob Agents Chemother*  
665 64:e00674-20.
- 666 17. Chen C, Cui CY, Wu XT, Fang LX, He Q, He B, Long TF, Liao XP, Chen L, Liu  
667 YH, Sun J. 2021. Spread of *tet(X5)* and *tet(X6)* genes in multidrug-resistant  
668 *Acinetobacter baumannii* strains of animal origin. *Vet Microbiol* 253:108954.
- 669 18. Chen C, Cui CY, Zhang Y, He Q, Wu XT, Li G, Liao XP, Kreiswirth BN, Liu YH,  
670 Chen L, Sun J. 2019. Emergence of mobile tigecycline resistance mechanism  
671 in *Escherichia coli* strains from migratory birds in China. *Emerg Microbes*  
672 *Infect* 8:1219-1222.
- 673 19. Sun J, Chen C, Cui CY, Zhang Y, Liu X, Cui ZH, Ma XY, Feng Y, Fang LX, Lian  
674 XL, Zhang RM, Tang YZ, Zhang KX, Liu HM, Zhuang ZH, Zhou SD, Lv JN, Du  
675 H, Huang B, Yu FY, Mathema B, Kreiswirth BN, Liao XP, Chen L, Liu YH. 2019.  
676 Plasmid-encoded *tet(X)* genes that confer high-level tigecycline resistance in  
677 *Escherichia coli*. *Nat Microbiol* 4:1457-1464.
- 678 20. Chen C, Cui CY, Yu JJ, He Q, Wu XT, He YZ, Cui ZH, Li C, Jia QL, Shen XG,  
679 Sun RY, Wang XR, Wang MG, Tang T, Zhang Y, Liao XP, Kreiswirth BN, Zhou  
680 SD, Huang B, Du H, Sun J, Chen L, Liu YH. 2020. Genetic diversity and  
681 characteristics of high-level tigecycline resistance Tet(X) in *Acinetobacter*  
682 species. *Genome Med* 12:111.

- 683 21. Liu D, Zhai W, Song H, Fu Y, Schwarz S, He T, Bai L, Wang Y, Walsh TR, Shen  
684 J. 2020. Identification of the novel tigecycline resistance gene *tet(X6)* and its  
685 variants in *Myroides*, *Acinetobacter* and *Proteus* of food animal origin. J  
686 Antimicrob Chemother 75:1428-1431.
- 687 22. Wang L, Liu D, Lv Y, Cui L, Li Y, Li T, Song H, Hao Y, Shen J, Wang Y, Walsh  
688 TR. 2019. Novel plasmid-mediated *tet(X5)* gene conferring resistance to  
689 tigecycline, eravacycline and omadacycline in clinical *Acinetobacter*  
690 *baumannii*. Antimicrob Agents Chemother 64:e01326-19.
- 691 23. Cui CY, Chen C, Liu BT, He Q, Wu XT, Sun RY, Zhang Y, Cui ZH, Guo WY, Jia  
692 QL, Li C, Kreiswirth BN, Liao XP, Chen L, Liu YH, Sun J. 2020. Co-occurrence  
693 of Plasmid-Mediated Tigecycline and Carbapenem Resistance in  
694 *Acinetobacter* spp. from Waterfowls and Their Neighboring Environment.  
695 Antimicrob Agents Chemother 64.
- 696 24. Lin L, Ling BD, Li XZ. 2009. Distribution of the multidrug efflux pump genes,  
697 *adeABC*, *adeDE* and *adeIJK*, and class 1 integron genes in  
698 multiple-antimicrobial-resistant clinical isolates of *Acinetobacter*  
699 *baumannii*-*Acinetobacter calcoaceticus* complex. Int J Antimicrob Agents  
700 33:27-32.
- 701 25. Hu SH, Yuan SX, Qu H, Jiang T, Zhou YJ, Wang MX, Ming DS. 2016.  
702 Antibiotic resistance mechanisms of *Myroides* sp. J Zhejiang Univ Sci B  
703 17:188-99.
- 704 26. Cheng Y, Chen Y, Liu Y, Song J, Chen Y, Shan T, Xiao Y, Zhou K. 2021.



- 705           Detection of a new *tet(X6)*-encoding plasmid in *Acinetobacter towneri*. J Glob  
706           Antimicrob Resist 25:132-136.
- 707    27.    He D, Wang L, Zhao S, Liu L, Liu J, Hu G, Pan Y. 2020. A novel tigecycline  
708           resistance gene, *tet(X6)*, on an SXT/R391 integrative and conjugative element  
709           in a *Proteus* genomospecies 6 isolate of retail meat origin. J Antimicrob  
710           Chemother 75:1159-1164.
- 711    28.    Sun J, Chen C, Cui CY, Zhang Y, Liu X, Cui ZH, Ma XY, Feng Y, Fang LX, Lian  
712           XL, Zhang RM, Tang YZ, Zhang KX, Liu HM, Zhuang ZH, Zhou SD, Lv JN, Du  
713           H, Huang B, Yu FY, Mathema B, Kreiswirth BN, Liao XP, Chen L, Liu YH. 2019.  
714           Plasmid-encoded *tet(X)* genes that confer high-level tigecycline resistance in  
715           *Escherichia coli*. Nat Microbiol 4:1457-1464.
- 716    29.    Bai L, Du P, Du Y, Sun H, Zhang P, Wan Y, Lin Q, Fanning S, Cui S, Wu Y.  
717           2019. Detection of plasmid-mediated tigecycline-resistant gene *tet(X4)* in  
718           *Escherichia coli* from pork, Sichuan and Shandong Provinces, China,  
719           February 2019. Euro Surveill 24:1900340.
- 720    30.    Chen C, Chen L, Zhang Y, Cui CY, Wu XT, He Q, Liao XP, Liu YH, Sun J. 2019.  
721           Detection of chromosome-mediated *tet(X4)*-carrying *Aeromonas caviae* in a  
722           sewage sample from a chicken farm. J Antimicrob Chemother 74:3628-3630.
- 723    31.    Li R, Liu Z, Peng K, Liu Y, Xiao X, Wang Z. 2019. Co-occurrence of two *tet(X)*  
724           variants in an *Empedobacter brevis* of shrimp origin. Antimicrob Agents  
725           Chemother doi:10.1128/AAC.01636-19.
- 726    32.    Andersson DI, Hughes D. 2010. Antibiotic resistance and its cost: is it possible

- 727 to reverse resistance? *Nat Rev Microbiol* 8:260-71.
- 728 33. CLSI. 2019. Performance Standards for Antimicrobial Susceptibility Testing.  
729 29th ed. CLSI supplement M100. Wayne, PA: Clinical and Laboratory  
730 Standards Institute.
- 731 34. EUCAST. 2020. The European Committee on Antimicrobial Susceptibility  
732 Testing. Breakpoint tables for interpretation of MICs and zone diameters  
733 Version 10.0.
- 734 35. Jain C, Rodriguez RL, Phillippy AM, Konstantinidis KT, Aluru S. 2018. High  
735 throughput ANI analysis of 90K prokaryotic genomes reveals clear species  
736 boundaries. *Nat Commun* 9:5114.
- 737 36. Alikhan NF, Petty NK, Ben Zakour NL, Beatson SA. 2011. BLAST Ring Image  
738 Generator (BRIG): simple prokaryote genome comparisons. *BMC Genomics*  
739 12:402.
- 740 37. Wick RR, Judd LM, Gorrie CL, Holt KE. 2017. Unicycler: Resolving bacterial  
741 genome assemblies from short and long sequencing reads. *PLoS Comput Biol*  
742 13:e1005595.
- 743 38. Treangen TJ, Ondov BD, Koren S, Phillippy AM. 2014. The Harvest suite for  
744 rapid core-genome alignment and visualization of thousands of intraspecific  
745 microbial genomes. *Genome Biol* 15:524.
- 746 39. Kumar S, Stecher G, Li M, Knyaz C, Tamura K. 2018. MEGA X: Molecular  
747 Evolutionary Genetics Analysis across Computing Platforms. *Mol Biol Evol*  
748 35:1547-1549.

- 749 40. Overbeek R, Olson R, Pusch GD, Olsen GJ, Davis JJ, Disz T, Edwards RA,  
750 Gerdes S, Parrello B, Shukla M, Vonstein V, Wattam AR, Xia F, Stevens R.  
751 2014. The SEED and the Rapid Annotation of microbial genomes using  
752 Subsystems Technology (RAST). *Nucleic Acids Res* 42:D206-14.
- 753 41. Zankari E, Hasman H, Cosentino S, Vestergaard M, Rasmussen S, Lund O,  
754 Aarestrup FM, Larsen MV. 2012. Identification of acquired antimicrobial  
755 resistance genes. *J Antimicrob Chemother* 67:2640-4.
- 756 42. Sullivan MJ, Petty NK, Beatson SA. 2011. Easyfig: a genome comparison  
757 visualizer. *Bioinformatics* 27:1009-10.
- 758 43. Lam MMC, Wyres KL, Judd LM, Wick RR, Jenney A, Brisse S, Holt KE. 2018.  
759 Tracking key virulence loci encoding aerobactin and salmochelin siderophore  
760 synthesis in *Klebsiella pneumoniae*. *Genome Med* 10:77.
- 761 44. Langmead B, Salzberg SL. 2012. Fast gapped-read alignment with Bowtie 2.  
762 *Nat Methods* 9:357-9.
- 763 45. David S, Cohen V, Reuter S, Sheppard AE, Giani T, Parkhill J, European  
764 Survey of Carbapenemase-Producing *Enterobacteriaceae* Working G,  
765 Markers ESGfE, Rossolini GM, Feil EJ, Grundmann H, Aanensen DM. 2020.  
766 Integrated chromosomal and plasmid sequence analyses reveal diverse  
767 modes of carbapenemase gene spread among *Klebsiella pneumoniae*. *Proc*  
768 *Natl Acad Sci U S A* 117:25043-25054.
- 769 46. Kurtz S, Phillippy A, Delcher AL, Smoot M, Shumway M, Antonescu C,  
770 Salzberg SL. 2004. Versatile and open software for comparing large genomes.

771 Genome Biol 5:R12.

772 47. He T, Wei R, Zhang L, Sun L, Pang M, Wang R, Wang Y. 2017.

773 Characterization of NDM-5-positive extensively resistant *Escherichia coli*

774 isolates from dairy cows. Vet Microbiol 207:153-158.

775

776 **Figure legends:**

777 **Figure 1. Phylogenetic analysis of *tet(X)*-positive *Acinetobacter* isolates**

778 **collected in this study.** The core-genome SNPs of *tet(X)*-encoding strains were used

779 to generate the phylogenetic tree. The tree is rooted at strain ZJ199. The ARGs of

780 each strain are exhibited by heatmap, and the existence of ARGs is in red. MIC values

781 of each strain against tetracyclines are listed. AT205 has been reported previously

782 [24].

783

784 **Figure 2. Comparison of genomic context of *tet(X3)* (A) and *tet(X6)* (B) identified**

785 **in *Acinetobacter* spp. isolates.** Genes are indicated by colour-coded arrows

786 dependent on the functional annotations and direction of transcription. ARGs are in

787 red; mobile genetic element genes are in green; other function genes are in blue;

788 hypothetical genes are in orange. The **g**enomic context of *tet(X3)* identified in *A.*

789 *baumannii* 34AB (MK134375) and *A. indicus* AI2 (GCA012366935) are as the

790 reference for the comparison of *tet(X3)*; the **g**enomic context of *tet(X6)* identified in *P.*

791 *genomospecies* 6 T60 (CP043925) and *A. indicus* CMG3-2 (CP044446) are as the

792 reference for the comparison of *tet(X6)*.

793

794 **Figure 3. The growth curve of the recipient strain *A. baumannii* ATCC17978 and**  
795 **the transconjugant ATCC17978-pAT181.** The optical density at 600 nm was record  
796 every 30 min at 37°C. The assay was in triplicate.

797

798 **Figure 4. Phylogenetic analysis of *tet(X3)/tet(X6)*-encoding *A. indicus* (A) and**  
799 ***Acinetobacter* sp002018365 (B) genomes retrieved from GenBank.** The  
800 core-genome SNPs of *tet(X)*-encoding strains were used to generate the phylogenetic  
801 tree. The tree is mid-point rooted. The *tet(X)* genes (group), isolate source (host),  
802 sampling location (location) and years (date) of strains are shown at the right side of  
803 the tree in different colors. Two inter-regional transmission events for 4 and 5 strains  
804 of *A. indicus*, and one cross-host event for 4 strains of *Acinetobacter* sp002018365  
805 are highlighted by shading. The scale bar represents the number of SNPs.

806

807 **Figure 5. Pairwise sequence comparisons between circularized *tet(X3)/***  
808 ***tet(X6)*-carrying plasmids.** The heat map shows the percentage of aligned bases  
809 between pairs of *tet(X3)*-carrying plasmids (A) and *tet(X6)*-carrying plasmids (B). The  
810 row and column orders are the same. The information of host species, sampling  
811 source, sampling location and isolation years are indicated by colored graphic  
812 subsequent the phylogenetic tree. The 6 plasmids co-harbored *tet(X3)* and *tet(X6)*  
813 genes are boxed.

814

815 **Figure 6. Analysis of *tet(X3)* Plasmidome.** (A) Blasting results of the 17  
816 representative *tet(X3)*-carrying plasmids against 243 *tet(X3)*-positive genomes. The  
817 heat map shows the percentage of aligned bases between pairs of *tet(X3)*-positive  
818 plasmids and genomes. (B) Conservation of reference plasmid genes amongst 243  
819 genome sequences of *tet(X3)*-carrying *Acinetobacter* spp.. The frequency of each  
820 gene in the reference plasmid is shown in circularized heatmaps. Genes order in the  
821 corresponding reference plasmid are around the cell. The mean coverage of the  
822 reference plasmids sequence is indicated in percentages after the plasmid name.

823

824 **Supplementary figure 1. Comparative analysis of *tet(X)*-encoding plasmids in**  
825 **this study.** (A) The inner ring represents the circularized *tet(X3)*-encoding plasmid  
826 pAT181 as reference; (B) The inner ring represents the circularized *tet(X6)*-encoding  
827 plasmid pAT232 as reference; (C) The inner ring represents the circularized  
828 *tet(X6)*-encoding plasmid pAT235 as reference; (D) The inner ring represents the  
829 circularized *tet(X6)*-encoding plasmid pAT205 as reference.

830

831 **Supplementary figure 2. Verification of horizontal transfer of *tet(X3)*-encoding**  
832 **plasmid pAT181 in the transconjugant ATCC17978-pAT181.** The inner ring  
833 represents pAT181 as reference. The outer ring represents the mapping result of  
834 exogenous DNA in the transconjugant AB181 compared with the recipient strain  
835 ATCC17978.

836

837 **Supplementary figure 3. Phylogenetic analysis of *tet(X3)/tet(X6)*-encoding *A.***  
838 ***towneri* (A) and *A. variabilis* (B) genomes retrieved from GenBank.** The  
839 core-genome SNPs of *tet(X)*-encoding strains were used to generate the phylogenetic  
840 tree. The tree is mid-point rooted. The *tet(X)* genes (group), isolate source (host),  
841 sampling location (location) and years (date) of strains are exhibited at the right side  
842 of phylogenetic tree in different colors.  
843

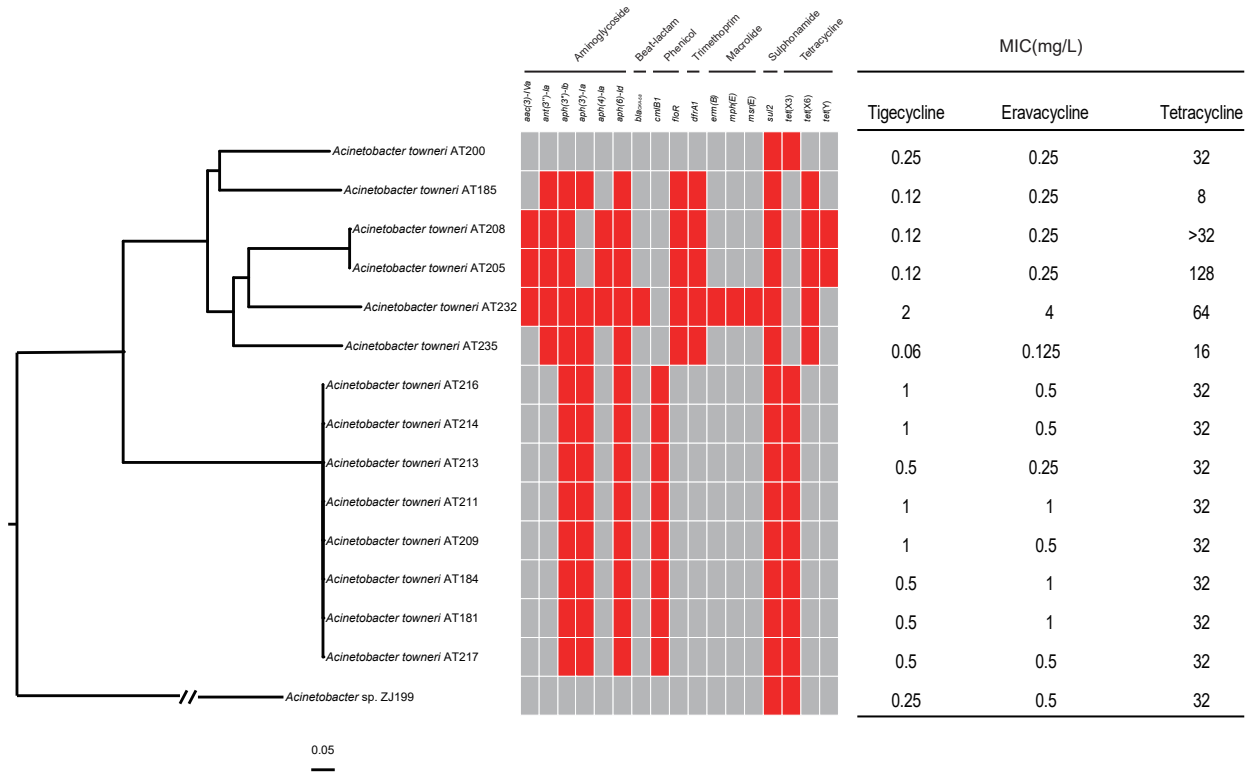



A.

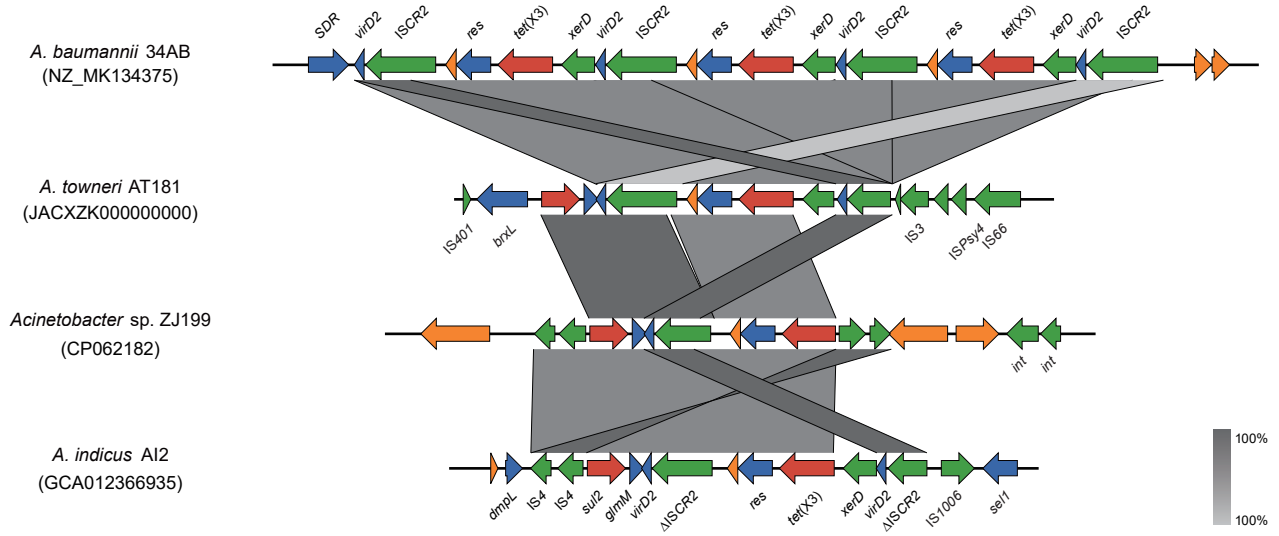

B.

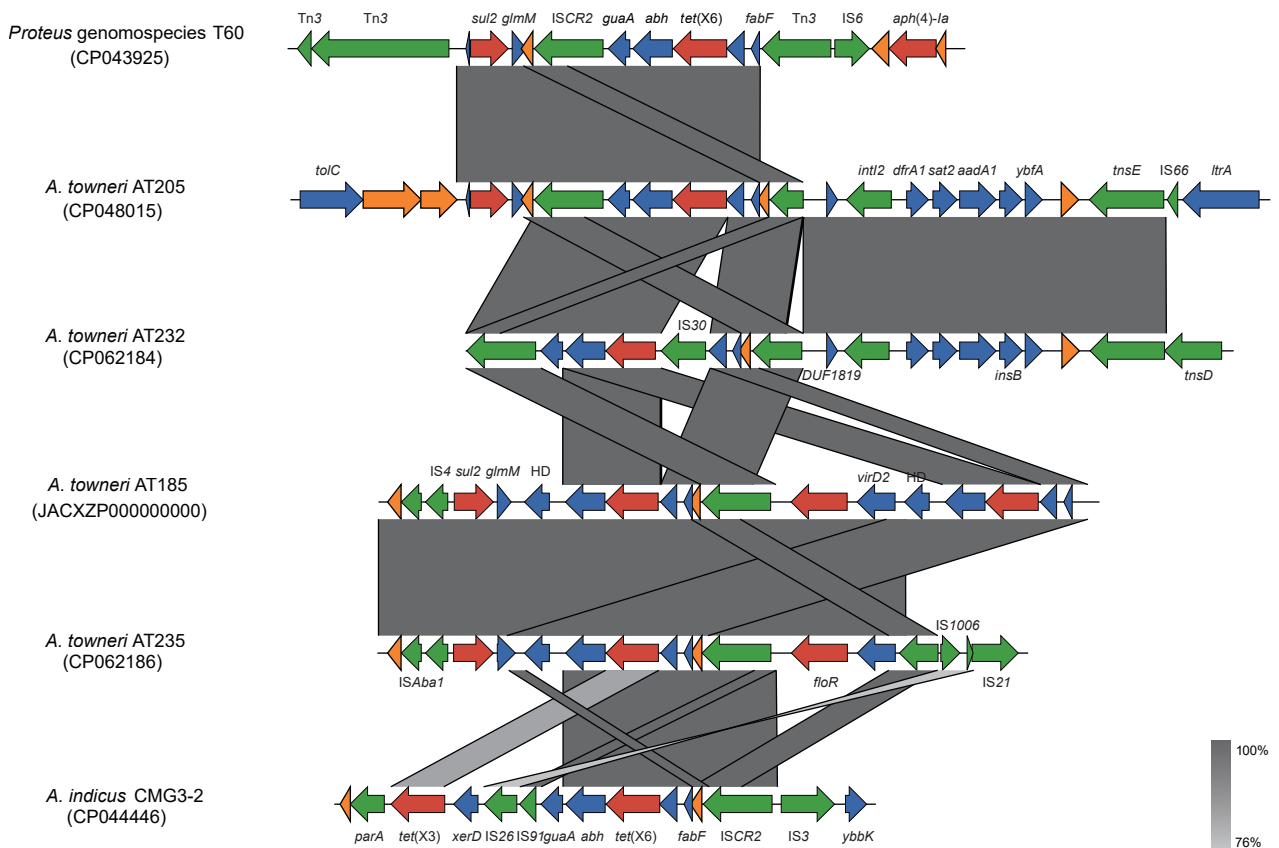

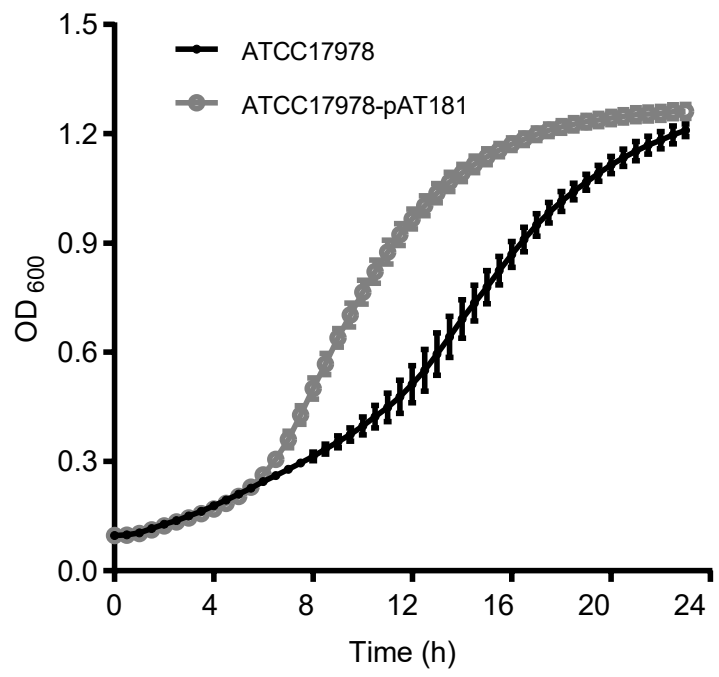

A.

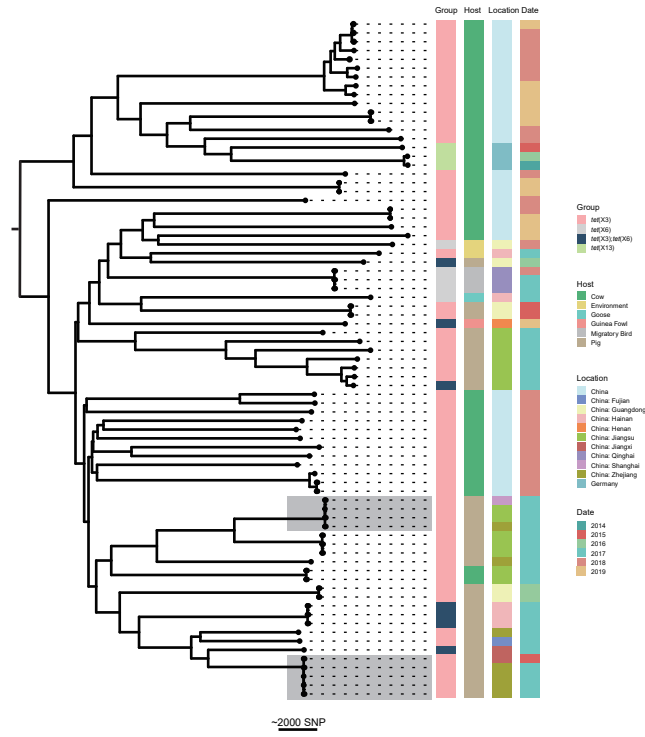

B.

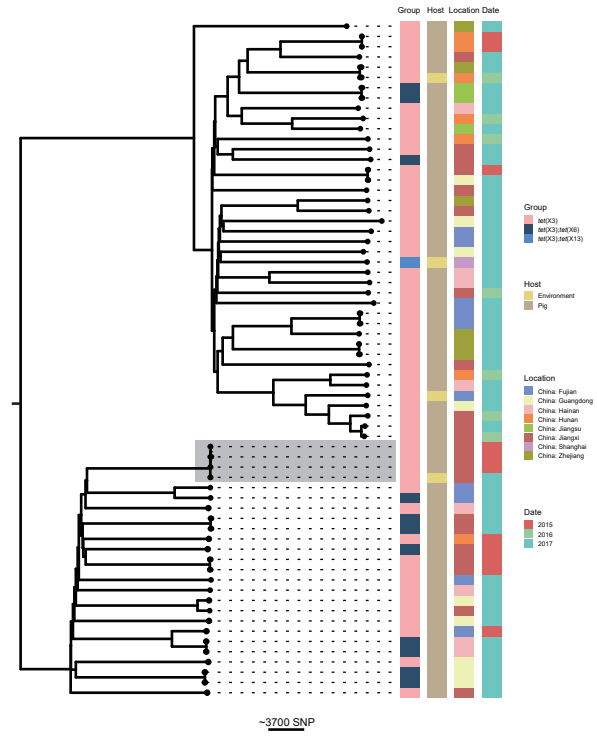

A.

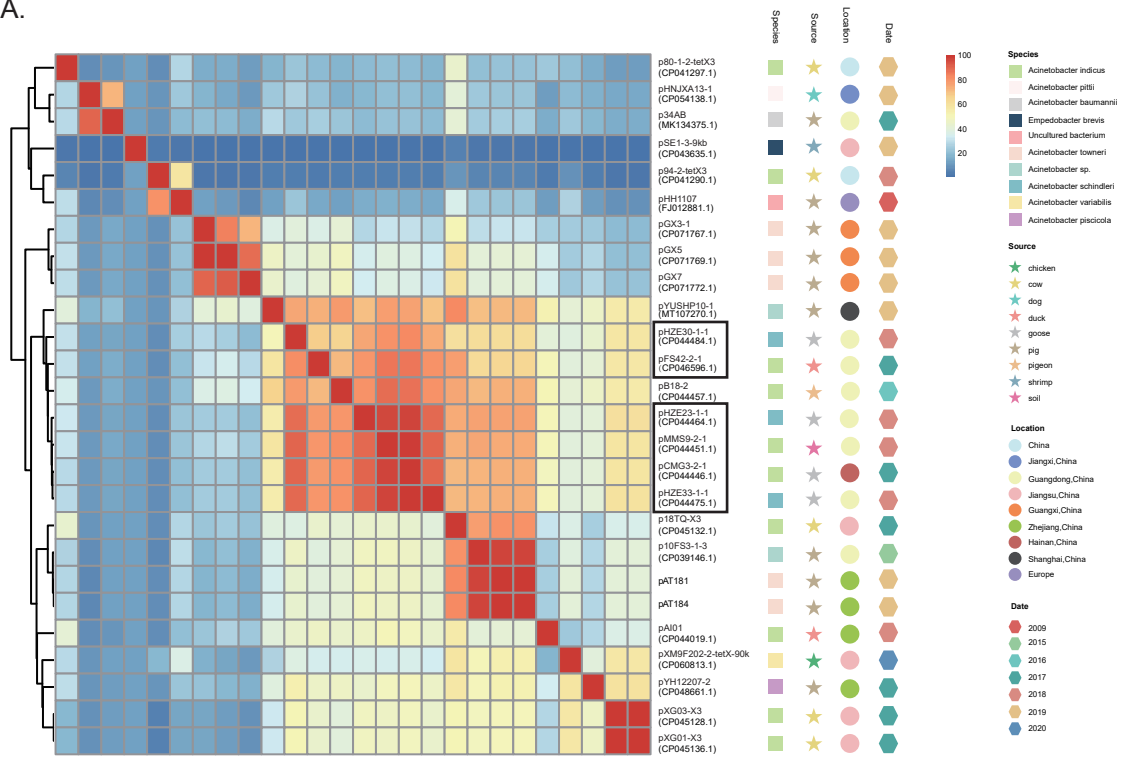

B.

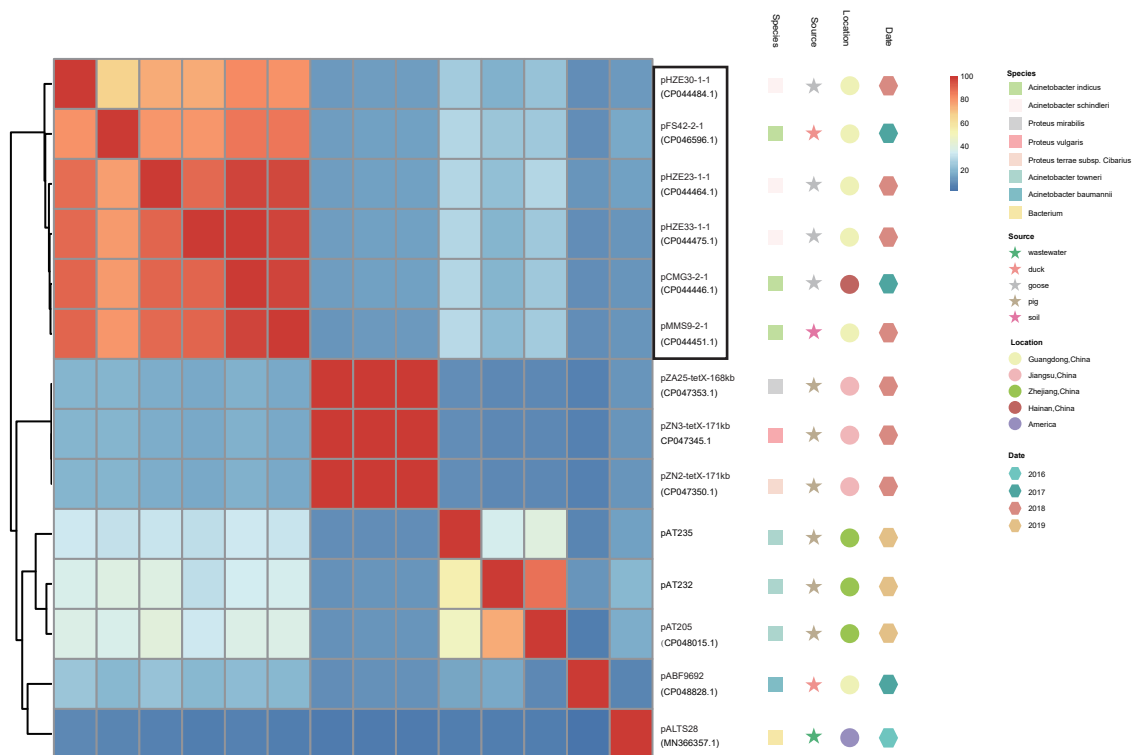

A.

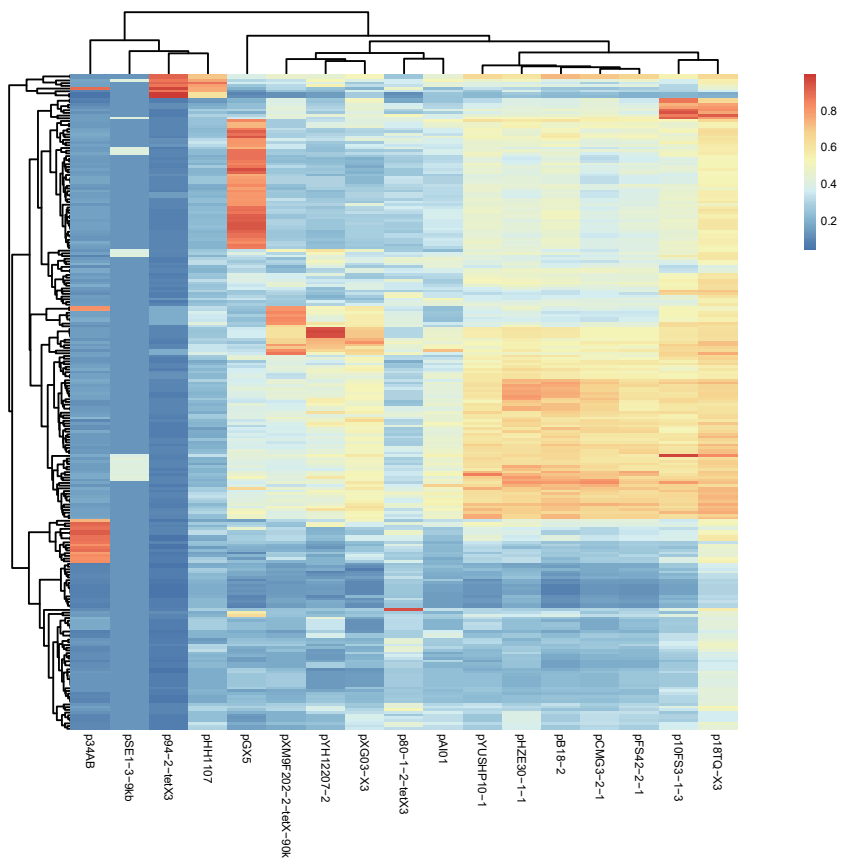

B.

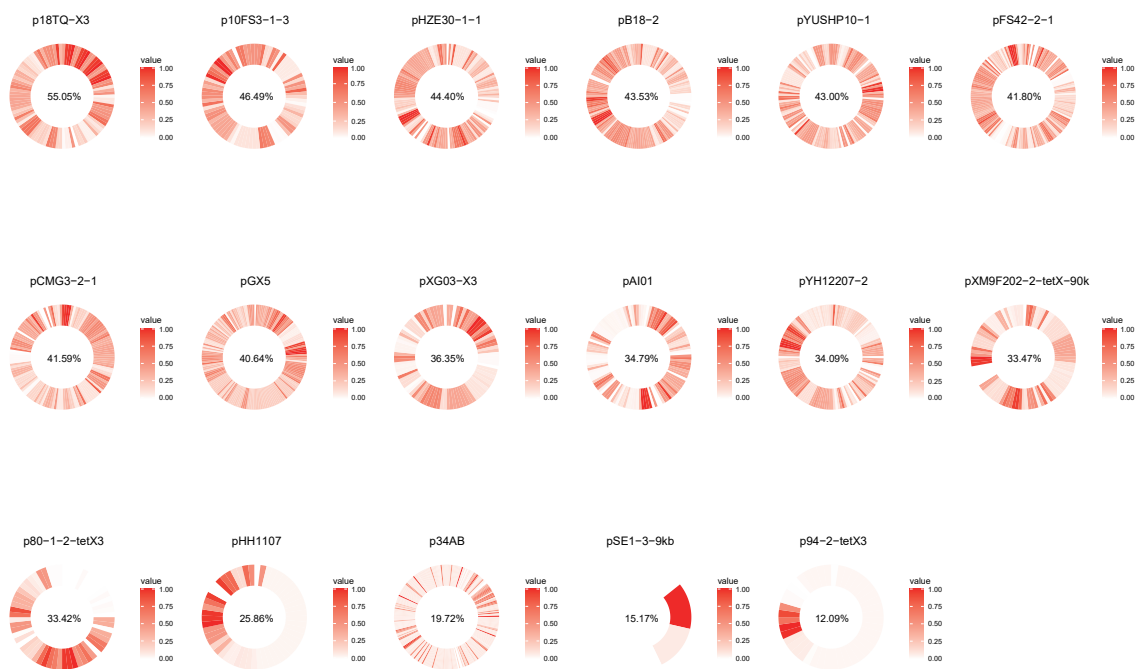

**Table 1. *tet(X)*-positive strains isolated in this study.**

| Strains | Species                       | <i>tet(X)</i> GENE | <i>tet(X)</i> Gene Location | Source              | Sequencing |                  |
|---------|-------------------------------|--------------------|-----------------------------|---------------------|------------|------------------|
|         |                               |                    |                             |                     | Platform   | Genome accession |
| ZJ202   | <i>Empedobacter stercoris</i> | <i>tet(X2)</i>     | chromosome                  | fecal, swine farm 1 | Illumina   | JABFOQ000000000  |
| ZJ180   | <i>Empedobacter stercoris</i> | <i>tet(X2)</i>     | chromosome                  | fecal, swine farm 1 | Illumina   | JACXZB000000000  |
| ZJ215   | <i>Empedobacter stercoris</i> | <i>tet(X2)</i>     | chromosome                  | fecal, swine farm 1 | Illumina   | JACXZC000000000  |
| ZJ286   | <i>Myroides odoratimimus</i>  | <i>tet(X2)</i>     | NA                          | soil, swine farm 2  | Illumina   | JACXZD000000000  |
| ZJ291   | <i>Myroides odoratimimus</i>  | <i>tet(X2)</i>     | NA                          | soil, swine farm 2  | Illumina   | JACXZE000000000  |
| ZJ295   | <i>Myroides odoratimimus</i>  | <i>tet(X2)</i>     | NA                          | soil, swine farm 2  | Illumina   | JACXZF000000000  |
| AT184   | <i>Acinetobacter towneri</i>  | <i>tet(X3)</i>     | plasmid                     | fecal, swine farm 1 | nanopore   | JACXZG000000000  |
| ZJ199   | <i>Acinetobacter sp.</i>      | <i>tet(X3)</i>     | chromosome                  | fecal, swine farm 1 | nanopore   | CP062182         |
| AT200   | <i>Acinetobacter towneri</i>  | <i>tet(X3)</i>     | plasmid                     | fecal, swine farm 1 | Illumina   | JACXZH000000000  |
| AT216   | <i>Acinetobacter towneri</i>  | <i>tet(X3)</i>     | plasmid                     | fecal, swine farm 1 | Illumina   | JACXZI000000000  |

|       |                              |                  |         |                     |          |                 |
|-------|------------------------------|------------------|---------|---------------------|----------|-----------------|
| AT217 | <i>Acinetobacter towneri</i> | tet(X3)          | plasmid | fecal, swine farm 1 | Illumina | JACXZJ000000000 |
| AT181 | <i>Acinetobacter towneri</i> | tet(X3)          | plasmid | fecal, swine farm 1 | nanopore | JACXZK000000000 |
| AT209 | <i>Acinetobacter towneri</i> | tet(X3)          | plasmid | fecal, swine farm 1 | Illumina | JACXZL000000000 |
| AT211 | <i>Acinetobacter towneri</i> | tet(X3)          | plasmid | fecal, swine farm 1 | Illumina | JACXZM000000000 |
| AT213 | <i>Acinetobacter towneri</i> | tet(X3)          | plasmid | fecal, swine farm 1 | Illumina | JACXZN000000000 |
| AT214 | <i>Acinetobacter towneri</i> | tet(X3)          | plasmid | fecal, swine farm 1 | Illumina | JACXZO000000000 |
| AT185 | <i>Acinetobacter towneri</i> | tet(X6), tet(X6) | plasmid | fecal, swine farm 1 | Illumina | JACXZP000000000 |
| AT208 | <i>Acinetobacter towneri</i> | tet(X6)          | plasmid | fecal, swine farm 1 | Illumina | JACXZQ000000000 |
| AT232 | <i>Acinetobacter towneri</i> | tet(X6)          | plasmid | fecal, swine farm 1 | nanopore | CP062183-       |
|       |                              |                  |         |                     |          | CP062184        |
| AT235 | <i>Acinetobacter towneri</i> | tet(X6)          | plasmid | fecal, swine farm 1 | nanopore | CP062185-       |
|       |                              |                  |         |                     |          | CP062186        |
| AT205 | <i>Acinetobacter towneri</i> | tet(X6)          | plasmid | fecal, swine farm 1 | nanopore | CP048014-       |

|       |                               |                                       |            |                     |          |                       |
|-------|-------------------------------|---------------------------------------|------------|---------------------|----------|-----------------------|
|       |                               |                                       |            |                     |          | CP048018              |
| ZJ183 | <i>Empedobacter stercoris</i> | <i>tet(X14), tet(X2),<br/>tet(X2)</i> | chromosome | fecal, swine farm 1 | nanopore | CP053698-<br>CP053701 |
| ZJ182 | <i>Empedobacter stercoris</i> | <i>tet(X14)-tet(X2)</i>               | chromosome | fecal, swine farm 1 | Illumina | JACXZR000000000       |

---



**Table 2. MIC values of antibiotics tested in this study**

| Strains | MIC (mg/L) |      |       |       |       |       |      |      |       |      |      |     |      |      |      |      |      |      |      |      |
|---------|------------|------|-------|-------|-------|-------|------|------|-------|------|------|-----|------|------|------|------|------|------|------|------|
|         | CAZ        | CRO  | FEP   | IPM   | MEM   | CIP   | LVX  | AMK  | GEN   | SXT  | CSL  | COL | TGC  | OTC  | CTC  | DMC  | DOX  | MIN  | ERV  | TET  |
| ZJ202   | 4          | 2    | 0.125 | 0.25  | 0.125 | 1     | 0.5  | 16   | 8     | 0.25 | 2    | 16  | 0.5  | 32   | 4    | 4    | 1    | 0.5  | 0.5  | 16   |
| ZJ180   | 2          | 2    | 0.125 | 0.5   | 0.25  | 1     | 0.5  | 16   | 4     | 0.06 | 4    | 32  | 0.5  | 16   | 4    | 2    | 0.5  | 0.25 | 1    | 8    |
| ZJ215   | 2          | 2    | 0.25  | 0.5   | 0.125 | 0.125 | 0.5  | 2    | 4     | >8   | 0.25 | 16  | 0.5  | 32   | 4    | 4    | 1    | 0.5  | 1    | 16   |
| ZJ286   | 64         | >64  | 8     | >32   | 2     | >32   | 8    | >128 | >128  | 1    | >128 | >32 | 0.5  | >128 | >128 | >128 | >128 | 128  | 1    | >128 |
| ZJ291   | 64         | >64  | 8     | >32   | 2     | >32   | 16   | >128 | >128  | >8   | >128 | >32 | 2    | >128 | >128 | >128 | 64   | 32   | 1    | >128 |
| ZJ295   | 64         | >64  | 8     | >32   | 2     | >32   | 8    | >128 | >128  | 0.5  | >128 | >32 | 0.5  | >128 | >128 | >128 | >128 | 16   | 0.5  | >128 |
| AT184   | 2          | 4    | 0.5   | 0.125 | 0.03  | 1     | 1    | 1    | 1     | >8   | 1    | 0.5 | 0.5  | 128  | 16   | 16   | 1    | 0.5  | 1    | 32   |
| ZJ199   | 0.25       | 0.25 | 0.06  | 0.03  | 0.03  | 4     | 2    | 0.06 | 0.125 | >8   | 0.06 | 1   | 0.25 | 128  | 16   | 8    | 2    | 0.25 | 0.5  | 32   |
| AT200   | 2          | 4    | 0.25  | 0.125 | 0.03  | 0.03  | 0.06 | 0.25 | 0.125 | >8   | 0.5  | 2   | 0.25 | 64   | 8    | 4    | 0.5  | 0.5  | 0.25 | 32   |
| AT216   | 2          | 4    | 0.5   | 0.125 | 0.06  | 2     | 0.5  | 1    | 0.25  | >8   | 0.25 | 1   | 1    | 64   | 16   | 8    | 0.5  | 0.25 | 0.5  | 32   |

|       |   |   |      |       |       |      |     |     |       |      |      |     |      |      |     |     |      |       |       |     |
|-------|---|---|------|-------|-------|------|-----|-----|-------|------|------|-----|------|------|-----|-----|------|-------|-------|-----|
| AT217 | 2 | 4 | 0.5  | 0.125 | 0.06  | 2    | 0.5 | 1   | 0.25  | 8    | 0.25 | 1   | 0.5  | 128  | 16  | 16  | 0.5  | 0.25  | 0.5   | 32  |
| AT181 | 2 | 4 | 0.25 | 0.125 | 0.06  | 1    | 0.5 | 1   | 0.5   | >8   | 1    | 1   | 0.5  | 128  | 16  | 16  | 1    | 0.5   | 1     | 32  |
| AT209 | 2 | 4 | 0.25 | 0.125 | 0.03  | 0.03 | 0.5 | 1   | 0.5   | >8   | 1    | 0.5 | 1    | 128  | 16  | 8   | 0.5  | 0.5   | 0.5   | 32  |
| AT211 | 2 | 4 | 0.25 | 0.125 | 0.03  | 0.03 | 0.5 | 1   | 0.5   | >8   | 1    | 1   | 1    | 128  | 16  | 8   | 1    | 0.25  | 1     | 32  |
| AT213 | 2 | 4 | 0.25 | 0.125 | 0.03  | 0.03 | 0.5 | 2   | 0.5   | >8   | 1    | 1   | 0.5  | 128  | 16  | 8   | 0.5  | 0.5   | 0.25  | 32  |
| AT214 | 2 | 4 | 0.25 | 0.125 | 0.03  | 0.03 | 0.5 | 2   | 0.5   | >8   | 1    | 1   | 1    | 64   | 8   | 8   | 0.25 | 0.5   | 0.5   | 32  |
| AT185 | 2 | 4 | 0.5  | 0.25  | 0.03  | 1    | 0.5 | 0.5 | 0.25  | >8   | 1    | 2   | 0.12 | 32   | 8   | 4   | 0.25 | 0.25  | 0.25  | 8   |
| AT208 | 2 | 4 | 0.25 | 0.25  | 0.03  | 0.03 | 1   | 1   | 8     | >8   | 1    | 2   | 0.12 | >128 | 128 | 128 | 16   | 2     | 0.25  | >32 |
| AT232 | 2 | 4 | 0.5  | 0.25  | 0.06  | 4    | 1   | 0.5 | 4     | 8    | 0.5  | 2   | 2    | 128  | 64  | 32  | 4    | 2     | 4     | 64  |
| AT235 | 2 | 4 | 0.5  | 0.125 | 0.03  | 4    | 1   | 0.5 | 0.125 | 8    | 0.25 | 2   | 0.06 | 32   | 4   | 2   | 0.25 | 0.25  | 0.125 | 16  |
| AT205 | 4 | 8 | 0.5  | 0.5   | 0.06  | 4    | 1   | 1   | 8     | >8   | 1    | 2   | 0.12 | 128  | 128 | 128 | 32   | 0.5   | 0.25  | 128 |
| ZJ183 | 2 | 4 | 0.5  | 0.25  | 0.125 | 1    | 1   | 32  | 16    | 0.06 | 4    | 32  | 1    | 128  | 8   | 8   | 4    | 0.125 | 1     | 16  |
| ZJ182 | 1 | 1 | 0.06 | 0.125 | 0.125 | 2    | 1   | 16  | 8     | 0.06 | 2    | 32  | 1    | 64   | 8   | 8   | 2    | 1     | 2     | 16  |

---

Abbreviation: CAZ, Ceftazidime; CRO, Ceftriaxone; FEP, Cefepime; IPM, Imipenem; MEM, Meropenem; CIP, Ciprofloxacin; LVX, Levofloxacin; AMK, Amikacin; GEN, Gentamycin; SXT, Sulfamethoxazole-Trimethoprim; CSL, Cefoperazone-Sulbactam; COL, Colistin; TGC, Tigecycline; OTC, Oxytetracycline; CTC, Chlortetracycline; DMC, Demeclocycline; DOX, Doxycycline; MIN, Minocycline; ERV, Eravacycline; TET, Tetracycline.

**Table 3. MIC values of tetracyclines tested in this study**

| Strains                                                                | MIC (mg/L) |      |      |      |      |      |     |     |
|------------------------------------------------------------------------|------------|------|------|------|------|------|-----|-----|
|                                                                        | TGC        | TET  | OTC  | CTC  | DMC  | DOX  | MIN | ERV |
| <b>DH5<math>\alpha</math>-<i>tet</i>(X3)promoter-<i>tet</i>(X6)ORF</b> | 8          | >128 | >128 | >128 | >128 | >128 | 8   | 8   |
| <b>DH5<math>\alpha</math>-<i>tet</i>(X6)promoter-<i>tet</i>(X6)ORF</b> | 8          | >128 | >128 | >128 | >128 | >128 | 16  | 8   |
| <b>DH5<math>\alpha</math>-<i>tet</i>(X6)promoter-<i>tet</i>(X3)ORF</b> | 32         | >128 | >128 | >128 | >128 | >128 | 64  | 32  |
| <b>DH5<math>\alpha</math>-<i>tet</i>(X3)promoter-<i>tet</i>(X3)ORF</b> | 16         | >128 | >128 | >128 | >128 | >128 | 32  | 32  |

Abbreviation: TGC, Tigecycline; TET, Tetracycline; OTC, Oxytetracycline; CTC, Chlortetracycline; DMC, Demeclocycline; DOX, Doxycycline; MIN,

Minocycline; ERV, Eravacycline.
